1 **Genetic discovery and translational decision support from exome sequencing**  
2 **of 20,791 type 2 diabetes cases and 24,440 controls from five ancestries**

3  
4 Jason Flannick<sup>1,2</sup>, Josep M Mercader<sup>1,3,\*</sup>, Christian Fuchsberger<sup>4,5,\*</sup>, Miriam S Udler<sup>1,6,\*</sup>,  
5 Anubha Mahajan<sup>7,8,\*</sup>, Jennifer Wessel<sup>9,10,11</sup>, Tanya M Teslovich<sup>12</sup>, Lizz Caulkins<sup>1</sup>, Ryan  
6 Koesterer<sup>1</sup>, Thomas W Blackwell<sup>4</sup>, Eric Boerwinkle<sup>13,14</sup>, Jennifer A Brody<sup>15</sup>, Ling  
7 Chen<sup>6</sup>, Siying Chen<sup>4</sup>, Cecilia Contreras-Cubas<sup>16</sup>, Emilio Córdova<sup>16</sup>, Adolfo Correa<sup>17</sup>,  
8 Maria Cortes<sup>18</sup>, Ralph A DeFronzo<sup>19</sup>, Lawrence Dolan<sup>20</sup>, Kimberly L Drews<sup>21</sup>,  
9 Amanda Elliott<sup>1,6</sup>, James S Floyd<sup>22</sup>, Stacey Gabriel<sup>18</sup>, Maria Eugenia Garay-Sevilla<sup>23</sup>,  
10 Humberto García-Ortiz<sup>16</sup>, Myron Gross<sup>24</sup>, Sohee Han<sup>25</sup>, Sarah Hanks<sup>4</sup>, Nancy L  
11 Heard-Costa<sup>26,27</sup>, Anne U Jackson<sup>4</sup>, Marit E Jørgensen<sup>28,29,30</sup>, Hyun Min Kang<sup>4</sup>, Megan  
12 Kelsey<sup>21</sup>, Bong-Jo Kim<sup>25</sup>, Heikki A Koistinen<sup>31,32,33</sup>, Johanna Kuusisto<sup>34,35</sup>, Joseph B  
13 Leader<sup>36</sup>, Allan Linneberg<sup>37,38,39</sup>, Ching-Ti Liu<sup>40</sup>, Jianjun Liu<sup>41,42,43</sup>, Valeriya  
14 Lyssenko<sup>44,45</sup>, Alisa K Manning<sup>46,47</sup>, Anthony Marcketta<sup>12</sup>, Juan Manuel Malacara-  
15 Hernandez<sup>23</sup>, Angélica Martínez-Hernández<sup>16</sup>, Karen Matsuo<sup>4</sup>, Elizabeth Mayer-  
16 Davis<sup>48</sup>, Elvia Mendoza-Caamal<sup>16</sup>, Karen L Mohlke<sup>49</sup>, Alanna C Morrison<sup>50</sup>, Anne  
17 Ndungu<sup>7</sup>, Maggie CY Ng<sup>51,52,53</sup>, Colm O'Dushlaine<sup>12</sup>, Anthony J Payne<sup>7</sup>, Catherine  
18 Pihoker<sup>54</sup>, Broad Genomics Platform<sup>18</sup>, Wendy S Post<sup>55</sup>, Michael Preuss<sup>56</sup>, Bruce M  
19 Psaty<sup>57,58</sup>, Ramachandran S Vasan<sup>27,59</sup>, N William Rayner<sup>7,8,60</sup>, Alexander P Reiner<sup>61</sup>,  
20 Cristina Revilla-Monsalve<sup>62</sup>, Neil R Robertson<sup>7,8</sup>, Nicola Santoro<sup>63</sup>, Claudia  
21 Schurmann<sup>56</sup>, Wing Yee So<sup>64,65,66</sup>, Heather M Stringham<sup>4</sup>, Tim M Strom<sup>67,68</sup>, Claudia  
22 HT Tam<sup>64,65,66</sup>, Farook Thameem<sup>69</sup>, Brian Tomlinson<sup>64</sup>, Jason M Torres<sup>7</sup>, Russell P  
23 Tracy<sup>70,71</sup>, Rob M van Dam<sup>42,43,72</sup>, Marijana Vujkovic<sup>73</sup>, Shuai Wang<sup>40</sup>, Ryan P Welch<sup>4</sup>,

24 Daniel R Witte<sup>74,75</sup>, Tien-Yin Wong<sup>76,77,78</sup>, Gil Atzmon<sup>79,80</sup>, Nir Barzilai<sup>79</sup>, John  
25 Blangero<sup>81</sup>, Lori L Bonnycastle<sup>82</sup>, Donald W Bowden<sup>51,52,53</sup>, John C Chambers<sup>83,84,85</sup>,  
26 Edmund Chan<sup>42</sup>, Ching-Yu Cheng<sup>86</sup>, Yoon Shin Cho<sup>87</sup>, Francis S Collins<sup>82</sup>, Paul S de  
27 Vries<sup>50</sup>, Ravindranath Duggirala<sup>81</sup>, Benjamin Glaser<sup>88</sup>, Clicerio Gonzalez<sup>89</sup>, Ma Elena  
28 Gonzalez<sup>90</sup>, Leif Groop<sup>44,91</sup>, Jaspal Singh Kooner<sup>92</sup>, Soo Heon Kwak<sup>93</sup>, Markku  
29 Laakso<sup>34,35</sup>, Donna M Lehman<sup>19</sup>, Peter Nilsson<sup>94</sup>, Timothy D Spector<sup>95</sup>, E Shyong  
30 Tai<sup>42,43,77</sup>, Tiinamaija Tuomi<sup>91,96,97,98</sup>, Jaakko Tuomilehto<sup>99,100,101,102</sup>, James G  
31 Wilson<sup>103</sup>, Carlos A Aguilar-Salinas<sup>104</sup>, Erwin Bottinger<sup>56</sup>, Brian Burke<sup>21</sup>, David J  
32 Carey<sup>36</sup>, Juliana Chan<sup>64,65,66</sup>, Josée Dupuis<sup>27,40</sup>, Philippe Frossard<sup>105</sup>, Susan R  
33 Heckbert<sup>106</sup>, Mi Yeong Hwang<sup>25</sup>, Young Jin Kim<sup>25</sup>, H Lester Kirchner<sup>36</sup>, Jong-Young  
34 Lee<sup>107</sup>, Juyoung Lee<sup>25</sup>, Ruth Loos<sup>56,108</sup>, Ronald CW Ma<sup>64,65,66</sup>, Andrew D Morris<sup>109</sup>,  
35 Christopher J O'Donnell<sup>110,111,112,113</sup>, Colin NA Palmer<sup>114</sup>, James Pankow<sup>115</sup>, Kyong  
36 Soo Park<sup>92,116,117</sup>, Asif Rasheed<sup>105</sup>, Danish Saleheen<sup>73,105</sup>, Xueling Sim<sup>43</sup>, Kerrin S  
37 Small<sup>95</sup>, Yik Ying Teo<sup>43,118,119</sup>, Christopher Haiman<sup>120</sup>, Craig L Hanis<sup>121</sup>, Brian E  
38 Henderson<sup>120</sup>, Lorena Orozco<sup>16</sup>, Teresa Tusié-Luna<sup>104,122</sup>, Frederick E Dewey<sup>12</sup>, Aris  
39 Baras<sup>12</sup>, Christian Gieger<sup>123,124</sup>, Thomas Meitinger<sup>67,68,125</sup>, Konstantin Strauch<sup>123,126</sup>,  
40 Leslie Lange<sup>127</sup>, Niels Grarup<sup>128</sup>, Torben Hansen<sup>128,129</sup>, Oluf Pedersen<sup>128</sup>, Phil  
41 Zeitler<sup>21</sup>, Dana Dabelea<sup>130</sup>, Goncalo Abecasis<sup>4</sup>, Graeme I Bell<sup>23</sup>, Nancy J Cox<sup>131</sup>, Mark  
42 Seielstad<sup>132,133</sup>, Rob Sladek<sup>134,135,136</sup>, James B Meigs<sup>18,46,137</sup>, Steve Rich<sup>138</sup>, Jerome I  
43 Rotter<sup>139</sup>, DiscovEHR Collaboration<sup>12,36</sup>, CHARGE, LuCamp, ProDiGY, GoT2D, ESP,  
44 SIGMA-T2D, T2D-GENES, AMP-T2D-GENES, David Altshuler<sup>1,6,46,140,141,142</sup>, Noël P  
45 Burt<sup>1</sup>, Laura J Scott<sup>4</sup>, Andrew P Morris<sup>7,143</sup>, Jose C Florez<sup>1,6,46,144</sup>, Mark I  
46 McCarthy<sup>7,8,145</sup>, Michael Boehnke<sup>4</sup>

- 47 1. Programs in Metabolism and Medical & Population Genetics, Broad Institute,  
48 Cambridge, Massachusetts, USA.
- 49 2. Division of Genetics and Genomics, Boston Children's Hospital, Boston,  
50 Massachusetts, USA.
- 51 3. Diabetes Unit and Center for Genomic Medicine, Massachusetts General Hospital,  
52 Boston, Massachusetts, USA.
- 53 4. Department of Biostatistics and Center for Statistical Genetics, University of  
54 Michigan, Ann Arbor, Michigan, USA.
- 55 5. Institute for Biomedicine, Eurac Research, Bolzano, Italy.
- 56 6. Diabetes Research Center (Diabetes Unit), Department of Medicine,  
57 Massachusetts General Hospital, Boston, Massachusetts, USA.
- 58 7. Wellcome Centre for Human Genetics, Nuffield Department of Medicine,  
59 University of Oxford, Oxford, UK.
- 60 8. Oxford Centre for Diabetes, Endocrinology and Metabolism, Radcliffe Department  
61 of Medicine, University of Oxford, Oxford, UK.
- 62 9. Department of Epidemiology, Fairbanks School of Public Health, Indiana  
63 University, Indianapolis, IN, 46202, US.
- 64 10. Department of Medicine, School of Medicine, Indiana University, Indianapolis, IN,  
65 46202, US.
- 66 11. Diabetes Translational Research Center, Indiana University, Indianapolis, IN,  
67 46202, US.
- 68 12. Regeneron Genetics Center, Regeneron Pharmaceuticals, Tarrytown, NY, 10591,  
69 USA.

- 70 13. Human Genetics Center, Department of Epidemiology Human Genetics and  
71 Environmental Sciences, School of Public Health, The University of Texas Health  
72 Science Center at Houston, Houston, Texas, USA.
- 73 14. Human Genome Sequencing Center, Baylor College of Medicine, Houston, Texas,  
74 USA.
- 75 15. Cardiovascular Research Unit, Department of Medicine, University of  
76 Washington, Seattle, WA, USA.
- 77 16. Instituto Nacional de Medicina Genómica, Mexico City, Mexico.
- 78 17. Department of Medicine, University of Mississippi Medical Center, Jackson,  
79 Mississippi, USA.
- 80 18. Broad Institute of MIT and Harvard, Cambridge, Massachusetts, USA.
- 81 19. Department of Medicine, University of Texas Health Science Center, San Antonio,  
82 Texas, USA.
- 83 20. Cincinnati Children's Hospital Medical Center, Ohio, Cincinnati, USA.
- 84 21. Biostatistics Center, George Washington University, Rockville, MD, USA.
- 85 22. Department of Medicine and Epidemiology, University of Washington, Seattle,  
86 WA, USA.
- 87 23. Departments of Medicine and Human Genetics, The University of Chicago,  
88 Chicago, Illinois, USA.
- 89 24. Department of Laboratory Medicine and Pathology, University of Minnesota,  
90 Minneapolis, Minnesota, USA.
- 91 25. Division of Genome Research, Center for Genome Science, National Institute of  
92 Health, Chungcheongbuk-do, Republic of Korea.

- 93 26. Department of Neurology, Boston University School of Medicine, Boston,  
94 Massachusetts, USA.
- 95 27. National Heart Lung and Blood Institute's Framingham Heart Study, Framingham,  
96 Massachusetts, USA.
- 97 28. Steno Diabetes Center Copenhagen, Gentofte, Denmark.
- 98 29. National Institute of Public Health, University of Southern Denmark, Copenhagen,  
99 Denmark.
- 100 30. Greenland Centre for Health Research, University of Greenland, Nuuk, Greenland.
- 101 31. Department of Public Health Solutions, National Institute for Health and Welfare,  
102 Helsinki, Finland.
- 103 32. University of Helsinki and Department of Medicine, Helsinki University Central  
104 Hospital, Helsinki, Finland.
- 105 33. Minerva Foundation Institute for Medical Research, Helsinki, Finland.
- 106 34. Institute of Clinical Medicine, Internal Medicine, University of Eastern Finland,  
107 Kuopio, Finland.
- 108 35. Department of Medicin, Kuopio University Hospital, Kuopio, Finland.
- 109 36. Geisinger Health System, Danville, PA, 17822, USA.
- 110 37. Department of Clinical Medicine, Faculty of Health and Medical Sciences,  
111 University of Copenhagen, Copenhagen, Denmark.
- 112 38. Center for Clinical Research and Prevention, Bispebjerg and Frederiksberg  
113 Hospital, The Capital Region, Copenhagen, Denmark.
- 114 39. Department of Clinical Experimental Research, Rigshospitalet, Copenhagen,  
115 Denmark.

- 116 40. Department of Biostatistics, Boston University School of Public Health, Boston,  
117 Massachusetts, USA.
- 118 41. Genome Institute of Singapore, Agency for Science Technology and Research,  
119 Singapore.
- 120 42. Department of Medicine, Yong Loo Lin School of Medicine, National University of  
121 Singapore, National University Health System, Singapore.
- 122 43. Saw Swee Hock School of Public Health, National University of Singapore,  
123 Singapore.
- 124 44. Department of Clinical Sciences, Diabetes and Endocrinology, Lund University  
125 Diabetes Centre, Malmö, Sweden.
- 126 45. University of Bergen, Norway.
- 127 46. Department of Medicine, Harvard Medical School, Boston, Massachusetts, USA.
- 128 47. Clinical and Translational Epidemiology Unit, Massachusetts General Hospital,  
129 Harvard University, Boston, MA, USA.
- 130 48. University of North Carolina Chapel Hill, Chapel Hill, North Carolina, USA.
- 131 49. Department of Genetics, University of North Carolina, Chapel Hill, North Carolina,  
132 USA.
- 133 50. Human Genetics Center, Department of Epidemiology Human Genetics and  
134 Environmental Sciences, School of Public Health, The University of Texas Health  
135 Science Center at Houston, Houston, Texas, USA.
- 136 51. Center for Diabetes Research, Wake Forest School of Medicine, Winston-Salem,  
137 North Carolina, USA.

- 138 52. Center for Genomics and Personalized Medicine Research, Wake Forest School of  
139 Medicine, Winston-Salem, North Carolina, USA.
- 140 53. Department of Biochemistry, Wake Forest School of Medicine, Winston-Salem,  
141 North Carolina, USA.
- 142 54. Seattle Children's Hospital, Washington, Seattle, USA.
- 143 55. Division of Cardiology, Department of Medicine, Johns Hopkins University,  
144 Baltimore, Maryland, USA.
- 145 56. Charles R. Bronfman Institute of Personalized Medicine, Mount Sinai School of  
146 Medicine, New York, New York, USA.
- 147 57. Cardiovascular Health Research Unit, Departments of Medicine, Epidemiology,  
148 and Health Services, University of Washington, Seattle, Washington, USA.
- 149 58. Kaiser Permanente Washington Health Research Institute, Seattle, Washington,  
150 USA.
- 151 59. Preventive Medicine & Epidemiology, Medicine, Boston University School of  
152 Medicine, Boston, Massachusetts, USA.
- 153 60. Department of Human Genetics, Wellcome Trust Sanger Institute, Hinxton,  
154 Cambridgeshire, UK.
- 155 61. University of Washington, Seattle, Washington, USA.
- 156 62. Instituto Mexicano del Seguro Social SXXI, Mexico City, Mexico.
- 157 63. Department of Pediatrics, Yale University, New Haven, CT, USA.
- 158 64. Department of Medicine and Therapeutics, The Chinese University of Hong Kong,  
159 Hong Kong, China.

- 160 65. Li Ka Shing Institute of Health Sciences, The Chinese University of Hong Kong,  
161 Hong Kong, China.
- 162 66. Hong Kong Institute of Diabetes and Obesity, The Chinese University of Hong  
163 Kong, Hong Kong, China.
- 164 67. Institute of Human Genetics, Technische Universität München, Munich, Germany.
- 165 68. Institute of Human Genetics, Helmholtz Zentrum München, German Research  
166 Center for Environmental Health, Neuherberg, Germany.
- 167 69. Department of Biochemistry, Faculty of Medicine, Health Science Center, Kuwait  
168 University, Safat, Kuwait.
- 169 70. Department of Pathology and Laboratory Medicine, Robert Larner, M.D. College  
170 of Medicine, University of Vermont, Burlington, Vermont, USA.
- 171 71. Department of Biochemistry, Robert Larner M.D. College of Medicine, University  
172 of Vermont, Burlington, Vermont, USA.
- 173 72. Department of Nutrition, Harvard School of Public Health, Boston, Massachusetts,  
174 USA.
- 175 73. Department of Biostatistics and Epidemiology, University of Pennsylvania,  
176 Philadelphia, Pennsylvania, USA.
- 177 74. Department of Public Health, Aarhus University, Aarhus, Denmark.
- 178 75. Danish Diabetes Academy, Odense, Denmark.
- 179 76. Singapore Eye Research Institute, Singapore National Eye Centre, Singapore.
- 180 77. Duke-NUS Medical School Singapore, Singapore.
- 181 78. Department of Ophthalmology, Yong Loo Lin School of Medicine, National  
182 University of Singapore, National University Health System, Singapore.



- 183 79. Departments of Medicine and Genetics, Albert Einstein College of Medicine, New  
184 York, USA.
- 185 80. University of Haifa, Faculty of natural science, Haifa, Isarel.
- 186 81. Department of Human Genetics and South Texas Diabetes and Obesity Institute,  
187 University of Texas Rio Grande Valley, Edinburg and Brownsville, Texas, USA.
- 188 82. Medical Genomics and Metabolic Genetics Branch, National Human Genome  
189 Research Institute, National Institutes of Health, Bethesda, Maryland, USA.
- 190 83. Department of Epidemiology and Biostatistics, Imperial College London, London,  
191 UK.
- 192 84. Department of Cardiology, Ealing Hospital NHS Trust, Southall, Middlesex, UK.
- 193 85. Imperial College Healthcare NHS Trust, Imperial College London, London, UK.
- 194 86. Ophthalmology & Visual Sciences Academic Clinical Program (Eye ACP), Duke-  
195 NUS Medical School, Singapore
- 196 87. Department of Biomedical Science, Hallym University, Chuncheon, Republic of  
197 Korea.
- 198 88. Endocrinology and Metabolism Service, Hadassah-Hebrew University Medical  
199 Center, Jerusalem, Israel.
- 200 89. Unidad de Diabetes y Riesgo Cardiovascular, Instituto Nacional de Salud Pública,  
201 Cuernavaca, Morelos, Mexico.
- 202 90. Centro de Estudios en Diabetes, Mexico City, Mexico.
- 203 91. Institute for Molecular Genetics Finland, University of Helsinki, Helsinki, Finland.
- 204 92. National Heart and Lung Institute, Cardiovascular Sciences, Hammersmith  
205 Campus, Imperial College London, London, UK.

- 206 93. Department of Internal Medicine, Seoul National University Hospital, Seoul,  
207 Republic of Korea.
- 208 94. Department of Clinical Sciences, Medicine, Lund University, Malmö, Sweden.
- 209 95. Department of Twin Research and Genetic Epidemiology, King's College London,  
210 London, UK.
- 211 96. Folkhälsan Research Centre, Helsinki, Finland.
- 212 97. Department of Endocrinology, Abdominal Centre, Helsinki University Hospital,  
213 Helsinki, Finland.
- 214 98. Research Programs Unit, Diabetes and Obesity, University of Helsinki, Helsinki,  
215 Finland.
- 216 99. Diabetes Prevention Unit, National Institute for Health and Welfare, Helsinki,  
217 Finland.
- 218 100. Center for Vascular Prevention, Danube University Krems, Krems, Austria.
- 219 101. Diabetes Research Group, King Abdulaziz University, Jeddah, Saudi Arabia.
- 220 102. Instituto de Investigacion Sanitaria del Hospital Universitario LaPaz (IdiPAZ),  
221 University Hospital LaPaz, Autonomous University of Madrid, Madrid, Spain.
- 222 103. Department of Physiology and Biophysics, University of Mississippi Medical  
223 Center, Jackson, Mississippi, USA.
- 224 104. Instituto Nacional de Ciencias Medicas y Nutricion, Mexico City, Mexico.
- 225 105. Center for Non-Communicable Diseases, Karachi, Pakistan.
- 226 106. Cardiovascular Health Research Unit and Department of Epidemiology,  
227 University of Washington, Seattle, WA, USA.
- 228 107. Ministry of Health and Welfare, Seoul, Republic of Korea.

- 229 108. The Mindich Child Health and Development Insititute, Icahn School of Medicine at  
230 Mount Sinai, New York, New York, USA.
- 231 109. Clinical Research Centre, Centre for Molecular Medicine, Ninewells Hospital and  
232 Medical School, Dundee, UK.
- 233 110. Section of Cardiology, Department of Medicine, VA Boston Healthcare, Boston,  
234 Massachusetts, USA.
- 235 111. Harvard Medical School, Boston, Massachusetts, USA.
- 236 112. Brigham and Women’s Hospital, Boston, Massachusetts, USA.
- 237 113. Intramural Administration Management Branch, National Heart Lung and Blood  
238 Institute, NIH, Framingham, Massachusetts, USA.
- 239 114. Pat Macpherson Centre for Pharmacogenetics and Pharmacogenomics, Medical  
240 Research Institute, Ninewells Hospital and Medical School, Dundee, UK.
- 241 115. Division of Epidemiology and Community Health, University of Minnesota,  
242 Minnesota, MN, USA.
- 243 116. Department of Molecular Medicine and Biopharmaceutical Sciences, Graduate  
244 School of Convergence Science and Technology, Seoul National University, Seoul,  
245 Republic of Korea.
- 246 117. Department of Internal Medicine, Seoul National University College of Medicine,  
247 Seoul, Republic of Korea.
- 248 118. Life Sciences Institute, National University of Singapore, Singapore.
- 249 119. Department of Statistics and Applied Probability, National University of  
250 Singapore, Singapore.

- 251 120. Department of Preventive Medicine, Keck School of Medicine, University of  
252 Southern California, Los Angeles, California, USA.
- 253 121. Human Genetics Center, School of Public Health, The University of Texas Health  
254 Science Center at Houston, Houston, Texas, USA.
- 255 122. Instituto de Investigaciones Biomédicas, Departamento de Medicina Genómica y  
256 Toxicología, Universidad Nacional Autónoma de México, Mexico City, Mexico.
- 257 123. Research Unit of Molecular Epidemiology, Institute of Epidemiology, Helmholtz  
258 Zentrum München, German Research Center for Environmental Health,  
259 Neuherberg, Germany.
- 260 124. German Center for Diabetes Research (DZD e.V.), Neuherberg, Germany.
- 261 125. Deutsches Forschungszentrum für Herz-Kreislaferkrankungen (DZHK), Partner  
262 Site Munich Heart Alliance, Munich, Germany.
- 263 126. Institute of Medical Informatics, Biometry and Epidemiology, Chair of Genetic  
264 Epidemiology, Ludwig-Maximilians-Universität, Neuherberg, Germany.
- 265 127. Department of Medicine, University of Colorado Denver, Anschutz Medical  
266 Campus, Aurora, Colorado, USA.
- 267 128. Novo Nordisk Foundation Center for Basic Metabolic Research, Faculty of Health  
268 and Medical Sciences, University of Copenhagen, Copenhagen, Denmark.
- 269 129. Faculty of Health Sciences, University of Southern Denmark, Odense, Denmark.
- 270 130. Department of Epidemiology, Colorado School of Public Health, Aurora, CO, USA.
- 271 131. Vanderbilt Genetics Institute, Vanderbilt University, Tennessee, Nashville, USA.
- 272 132. Department of Laboratory Medicine & Institute for Human Genetics, University of  
273 California, San Francisco, San Francisco, California, USA.

- 274 133. Blood Systems Research Institute, San Francisco, California, USA.
- 275 134. Department of Human Genetics, McGill University, Montreal, Quebec, Canada.
- 276 135. Division of Endocrinology and Metabolism, Department of Medicine, McGill  
277 University, Montreal, Quebec, Canada.
- 278 136. McGill University and Génome Québec Innovation Centre, Montreal, Quebec,  
279 Canada.
- 280 137. Division of General Internal Medicine, Massachusetts General Hospital, Boston,  
281 Massachusetts, USA.
- 282 138. Center for Public Health Genomics, University of Virginia School of Medicine,  
283 Charlottesville, Virginia, USA.
- 284 139. Departments of Pediatrics and Medicine, Institute for Translational Genomics and  
285 Population Sciences, Los Angeles BioMedical Research Institute at Harbor-UCLA  
286 Medical Center, Torrance, California, USA.
- 287 140. Department of Genetics, Harvard Medical School, Boston, Massachusetts, USA.
- 288 141. Department of Biology, Massachusetts Institute of Technology, Cambridge,  
289 Massachusetts, USA.
- 290 142. Department of Molecular Biology, Massachusetts General Hospital, Boston,  
291 Massachusetts, USA.
- 292 143. Department of Biostatistics, University of Liverpool, Liverpool, UK.
- 293 144. Center for Genomic Medicine, Massachusetts General Hospital, Boston,  
294 Massachusetts, USA.
- 295 145. Oxford NIHR Biomedical Research Centre, Oxford University Hospitals Trust,  
296 Oxford, UK.

297 **Abstract**

298 Protein-coding genetic variants that strongly affect disease risk can provide  
299 important clues into disease pathogenesis. Here we report an exome sequence  
300 analysis of 20,791 type 2 diabetes (T2D) cases and 24,440 controls from five  
301 ancestries. We identify rare (minor allele frequency < 0.5%) variant gene-level  
302 associations in (a) three genes at exome-wide significance, including a T2D-  
303 protective series of >30 *SLC30A8* alleles, and (b) within 12 gene sets, including those  
304 corresponding to T2D drug targets ( $p=6.1 \times 10^{-3}$ ) and candidate genes from knockout  
305 mice ( $p=5.2 \times 10^{-3}$ ). Within our study, the strongest T2D rare variant gene-level  
306 signals explain at most 25% of the heritability of the strongest common single-  
307 variant signals, and the rare variant gene-level effect sizes we observe in established  
308 T2D drug targets will require 110K-180K sequenced cases to exceed exome-wide  
309 significance. To help prioritize genes using associations from current smaller sample  
310 sizes, we present a Bayesian framework to recalibrate association  $p$ -values as  
311 posterior probabilities of association, estimating that reaching  $p < 0.05$  ( $p < 0.005$ ) in  
312 our study increases the odds of causal T2D association for a nonsynonymous variant  
313 by a factor of 1.8 (5.3). To help guide target or gene prioritization efforts, our data  
314 are freely available for analysis at [www.type2diabetesgenetics.org](http://www.type2diabetesgenetics.org).

315

## 316 **Introduction**

317 To better understand or treat disease, human genetics offers a powerful approach to  
318 identify molecular alterations causally associated with physiological traits<sup>1</sup>.

319 Common-variant array-based genome-wide association studies (GWAS) have  
320 discovered thousands of genomic loci associated with hundreds of human traits<sup>2</sup>,  
321 and further common variant analyses indicate that most complex trait heritability is  
322 attributable to modest-effect regulatory variants<sup>3-5</sup>. However, non-coding GWAS  
323 associations are challenging to localize to causal variants or genes<sup>6-10</sup>.

324

325 Protein-coding variants with strong effects on protein function or disease can offer  
326 molecular “probes” into the pathological relevance of a gene<sup>13-15</sup> and potentially  
327 establish a direct causal<sup>16,17</sup> link between gene gain or loss of function and disease  
328 risk<sup>18,19</sup> – especially when there is evidence of multiple independent variant  
329 associations (an “allelic series”) within a gene<sup>18-20</sup>. Several lines of argument<sup>11,12</sup>  
330 predict that strong-effect variants (allelic odds-ratios [OR]>2) will usually be rare  
331 (minor allele frequency [MAF]<0.5%) and, in many cases, difficult to accurately  
332 study through current GWAS and imputation strategies<sup>13,14</sup>. Whole genome or  
333 exome sequencing, by contrast, allows interrogation of the full spectrum of genetic  
334 variation.

335

336 Previous exome sequencing studies, however, have identified few exome-wide  
337 significant rare variant associations<sup>21-26</sup> for complex diseases such as type 2  
338 diabetes (T2D)<sup>24,27</sup>. This paucity of findings is due in part to the limited sample sizes

339 of previous studies, the largest of which include <10,000 disease cases and fall short  
340 of the sample sizes that analytic<sup>12</sup> and simulation-based calculations<sup>28-30</sup> predict are  
341 needed to identify rare disease-associated variants under plausible disease models.  
342 To expand our ability to use rare coding variants to make genetic discoveries and  
343 accelerate clinical translation, we collected and analyzed exome sequence data from  
344 20,791 T2D cases and 24,440 controls of multiple ancestries, representing the  
345 largest exome sequence analysis to date for T2D.

346

### 347 **Genetic discovery from single-variant and gene-level analysis**

348

349 Study participants (**Supplementary Table 1**) were drawn from five ancestries  
350 (Hispanic/Latino [effective size ( $N_{\text{eff}}$ )=14,442; 33.8%], European [ $N_{\text{eff}}$ =10,517;  
351 24.6%], African-American [ $N_{\text{eff}}$ =5,959; 13.9%], East-Asian [ $N_{\text{eff}}$ =6,010; 14.1%],  
352 South-Asian [ $N_{\text{eff}}$ =5,833; 13.6%]) and yielded equivalent statistical power to detect  
353 association as a balanced study of ~42,800 individuals or a population-based study  
354 (assuming 8% T2D prevalence) of ~152,000 individuals. Power to detect  
355 association was improved compared to the previous largest T2D exome sequencing  
356 study<sup>24</sup> of 6,504 cases and 6,436 controls, increasing (for example) from 5% to 90%  
357 for a variant with MAF=0.2% and OR=2.5 (**Supplementary Figure 1**).

358

359 Exome sequencing to 40x mean depth, variant calling using best-practice  
360 algorithms, and extensive data quality control (**Methods; Supplementary Figures**  
361 **2-5, Supplementary Table 2**) produced a dataset with 6.33M variants, of which



362 2.3% are common (MAF>5%), 4.2% low-frequency (0.5%<MAF<5%), and 93.5%  
363 rare (MAF<0.5%) (**Supplementary Table 3**). These include 2.26M nonsynonymous  
364 variants and 871K indels, more than twice the numbers analyzed in the largest  
365 previous T2D exome sequencing study<sup>24</sup>.  
366  
367 We first tested whether any of these variants, regardless of allele frequency,  
368 exhibited association with T2D (“single-variant” test; **Methods, Supplementary**  
369 **Figure 6**). Based on a previously demonstrated enrichment of coding variants for  
370 disease associations<sup>31</sup>, we used an exome-wide significance threshold of  $p=4.3\times 10^{-7}$ .  
371 Eighteen variants (ten nonsynonymous) in seven loci reached this threshold; 13 of  
372 these (eight nonsynonymous) reached the traditional genome-wide significance  
373 threshold of  $p<5\times 10^{-8}$  (**Figure 1a, Supplementary Table 4**). These 18 associations  
374 represent a substantial increase over the one association reported from the  
375 previous largest T2D exome sequencing study<sup>24</sup>. However, only two of these 18 have  
376 not been previously reported by (much larger) GWAS: a variant in *SFI1*  
377 (rs145181683, p.Arg724Trp; **Supplementary Figure 7**) that failed to replicate in  
378 an independent cohort (N=4,522,  $p=0.90$ , **Methods**), and a variant in *MC4R*  
379 (rs79783591, p.Ile269Asn).  
380  
381 *MC4R* p.Ile269Asn was the sole variant with association OR>2 (Hispanic/Latino  
382 MAF=0.89%;  $p=3.4\times 10^{-7}$ , OR=2.17 [95% CI: 1.63-2.89]). *MC4R* has long established  
383 effects on body-weight and diabetes<sup>32-34</sup>, and p.Ile269Asn specifically has been

384 shown to decrease MC4R activity<sup>35,36</sup> with associations to obesity and T2D in  
385 smaller studies of a United Kingdom family<sup>37</sup> and a Native American population<sup>36</sup>.  
386  
387 As single-variant analysis has limited power to detect associations with rarer  
388 variants<sup>12</sup>, we next performed tests of association for sets of variants within genes.  
389 We performed two gene-level association tests: (a) a burden test, which assumes all  
390 analyzed variants within a gene are of the same effect, and (b) SKAT<sup>38</sup>, which allows  
391 variability in variant effect size (and direction).  
392  
393 Following previous studies<sup>22-24</sup>, we separately tested seven different “masks” of  
394 variants grouped by similar predicted severity. As this analysis strategy led to  
395  $2 \times 7 = 14$  *p*-values for each gene, we developed two methods to consolidate these  
396 results for each test (**Methods; Supplementary Figures 8-10**). First, we retained  
397 only the smallest *p*-value but corrected for the effective number of independent  
398 masks tested<sup>39</sup>, on average 3.6 per gene (“minimum *p*-value test”). Second, we tested  
399 all nonsynonymous variants (i.e. missense, splice site, and protein truncating) but  
400 weighted each variant according to its estimated probability of causing gene  
401 inactivation<sup>12</sup> (“weighted test”, in essence assessing the effect of gene  
402 haploinsufficiency from combined analysis of protein-truncating and missense  
403 variants; **Methods**). We verified that the minimum *p*-value and weighted  
404 consolidation methods were both well-calibrated (**Supplementary Figure 11**) and  
405 between them produced broadly consistent but distinct results: across the ten most  
406 significantly-associated genes, *p*-values were nominally significant under both

407 methods for eight genes but varied by one-to-three orders of magnitude  
408 **(Supplementary Table 5)**. We employed a conservative Bonferroni-corrected  
409 gene-level exome-wide significance threshold of  $p=0.05/(2 \text{ tests} \times 2 \text{ consolidation}$   
410  $\text{methods} \times 19,020 \text{ genes})=6.57 \times 10^{-7}$ .  
411  
412 Using this strategy, gene-level associations reached exome-wide significance for  
413 *MC4R*, *SLC30A8*, and *PAM* (**Figure 1b, Supplementary Tables 5-6**). All three genes  
414 lie within previously T2D GWAS loci and contain previously identified coding single-  
415 variant signals: p.Arg325Trp and a series of 12 protective protein truncating  
416 variants (PTVs) for *SLC30A8*<sup>19,40</sup>, p.Asp563Gly and p.Ser539Trp for *PAM*<sup>24,41</sup>, and  
417 p.Ile269Asn for *MC4R*.  
418  
419 In addition to 11 previously observed PTVs, the *SLC30A8* gene-level signal includes  
420 92 variants (103 in total with combined MAF=1.4%; p.Arg325Trp was not included  
421 in gene-level analysis) and is associated with T2D protection (weighted  $p=1.3 \times 10^{-8}$ ,  
422 OR=0.40 [0.28-0.55]). Many variants contributed to this signal: when we  
423 progressively removed variants with the smallest single-variant  $p$ -values, removal  
424 of 33 was required to extinguish nominal ( $p<0.05$ ) gene-level significance (**Figure**  
425 **1cd, Supplementary Figure 12**). Although *SLC30A8* (and its protein product ZnT8)  
426 were first implicated in T2D over a decade ago<sup>40</sup>, their molecular disease  
427 mechanism(s) remain poorly understood<sup>42,43</sup> – in part because of seemingly  
428 conflicting observations of the common risk-increasing allele p.Arg325Trp  
429 (suggested to decrease protein activity<sup>44</sup>) and the rare risk-decreasing PTVs (also

430 thought to decrease protein activity<sup>19</sup>). The protective allelic series from our  
431 analysis argues that decreased, rather than increased, risk is the more typical effect  
432 of *SLC30A8* genetic variation, and it further provides many alleles that could be  
433 characterized to offer mechanistic insight.

434

435 The *MC4R* (combined MAF=0.79%; minimum  $p=2.7\times 10^{-10}$ , OR=2.07 [1.65-2.59]) and  
436 *PAM* (combined MAF=4.9%; weighted  $p=2.2\times 10^{-9}$ , OR=1.44 [1.28-1.62]) gene-level  
437 signals are due largely – but not entirely – to effects from individual variants  
438 (p.Ile269Asn for *MC4R*, p.Asp563Gly and p.Ser539Trp for *PAM*). For *MC4R*, gene-  
439 level association decreased but remained significant after removing p.Ile269Asn  
440 ( $p=8.6\times 10^{-3}$ ; **Supplementary Figure 13**). Similarly, as shown previously<sup>34,45</sup>,  
441 association was less significant after conditioning on sample BMI, both for the  
442 p.Ile269Asn single-variant signal ( $p=1.0\times 10^{-5}$ ) and the gene-level signal not  
443 attributable to p.Ile269Asn ( $p=0.035$ ).

444

445 The gene-level signal in *PAM* also remained nominally significant ( $p<0.05$ ) even  
446 after removing the 35 strongest individually associated *PAM* variants, indicating a  
447 contribution from substantially more variants than p.Asp563Gly and p.Ser539Trp  
448 (**Supplementary Figure 14**). Cellular characterization of p.Asp563Gly and  
449 p.Ser539Trp recently identified a novel mechanism for T2D risk through altered  
450 insulin storage and secretion<sup>46</sup>. Our results provide many more genetic variants –  
451 identifiable only through sequencing<sup>17</sup> – that could be characterized for further  
452 insights into the T2D risk mechanism mediated by *PAM*.

453

454 We finally assessed the 50 most-significant gene-level associations (as measured by  
455 minimum  $p$ -value across our four analyses; **Methods**) in two independent exome  
456 sequence datasets: 14,118 individuals (3,062 T2D cases and 9,405 controls of  
457 European or African-American ancestry) from the CHARGE discovery sequence  
458 project<sup>47</sup> (CHARGE, **Supplementary Table 7**; 50 genes available) and 49,199  
459 individuals (12,973 T2D cases and 36,226 controls of European ancestry) from the  
460 Geisinger Health System (GHS, **Supplementary Table 8**; 44 genes available). In  
461 each replication study, *MC4R*, *SLC30A8*, and *PAM* all showed burden test  
462 associations directionally consistent with those from our analysis. *MC4R* (minimum  
463  $p=0.0058$ ) and *SLC30A8* (minimum  $p=0.043$ ) further demonstrated nominally  
464 significant associations in the GHS burden analysis, and *MC4R* (minimum  $p=0.026$ )  
465 achieved nominal significance in the CHARGE SKAT analysis. The weaker  
466 associations in the replication studies compared to our study (**Supplementary**  
467 **Tables 7 and 8**) could be due to a winner's curse effect combined with differences  
468 in procedures for variant calling, quality control, annotation, and association testing.  
469  
470 More broadly, across the genes with replication results available and with burden  
471  $p<0.05$  in our analysis, we observed an excess of directionally consistent burden test  
472 associations (31 of 46 in CHARGE, one-sided binomial  $p=0.013$ ; 23 of 40 in GHS,  
473 one-sided binomial  $p=0.21$ ; overall one-sided binomial  $p=0.011$ ; **Supplementary**  
474 **Table 9**). Future studies may therefore enable several more of the top gene-level  
475 signals from our analysis to reach exome-wide significance.

476

477 **Further insights from gene-level analysis**

478

479 *SLC30A8*, *MC4R*, and *PAM* illustrate how exome-wide significant gene-level  
480 associations provide allelic series that could be characterized for pathogenic  
481 insights into previously T2D-associated but still incompletely understood genes. We  
482 next investigated the utility of less significant gene-level associations to either (a)  
483 genetically prioritize genes with no prior evidence of T2D association, (b) predict  
484 the effector gene at established T2D GWAS loci, or (c) predict whether loss or gain of  
485 protein function increases disease risk. We conducted this analysis at the level of 16  
486 sets of genes connected to T2D from different evidence sources (e.g. genes  
487 harboring diabetes-associated Mendelian or common variants, T2D drug targets<sup>48</sup>,  
488 or genes implicated in diabetes-related phenotypes from mouse models<sup>49</sup>;  
489 **Supplementary Table 10; Methods**).

490

491 First, for each gene set, we asked whether its genes had more significant gene-level  
492 associations than expected by chance. We used a one-sided Wilcoxon Rank-Sum  
493 Test to compare gene-level  $p$ -values within each gene set to those for random sets of  
494 genes with similar numbers of variants and aggregate frequencies (**Methods**).  
495 Twelve of the 16 gene sets achieved  $p < 0.05$  set-level associations (**Figure 2a-e**,  
496 **Supplementary Figure 15**), including those for T2D drug targets ( $p = 6.1 \times 10^{-3}$ ) and  
497 for genes reported from mouse models of non-autoimmune diabetes ( $p = 5.2 \times 10^{-3}$ ) or  
498 impaired glucose tolerance ( $p = 7.2 \times 10^{-6}$ ). Following a previous study that

499 retrospectively validated drug targets from the genetic effects of PTVs<sup>27</sup>, these  
500 results demonstrate the value of gene-level associations to prioritize candidate  
501 genes – e.g. those that emerge from high-throughput experimental screens<sup>50,51</sup> – for  
502 further investigation. Our study emphasizes the added power of including missense  
503 variants in this analysis: set-level  $p$ -values from analysis of PTVs alone were  $p>0.05$   
504 for almost all gene sets (although, notably, the drug target gene set remained  
505 significant at  $p=0.0061$ ; **Supplementary Figure 16**).

506

507 Next, we investigated whether effector genes that mediate GWAS associations –  
508 which mostly correspond to variants of uncertain regulatory effects – were also  
509 enriched for coding variant gene-level associations. We tested for associations  
510 within two sets of predicted effector genes: a curated list of 11 genes harboring  
511 likely causal common coding variants (reported from a recent study<sup>17</sup> with  
512 posterior probability of causal association  $>0.25$  from genetics alone; **Methods**), and  
513 20 genes significant in a transcript association analysis with T2D<sup>52</sup>. Genes with  
514 likely causal coding variants demonstrated a significant set-level association relative  
515 to comparison gene sets ( $p=8.8\times 10^{-3}$ ) and to genes within the same loci ( $p=0.028$ ;  
516 **Figure 2e**), even when we conditioned gene-level associations on all significant  
517 common variant signals. Most of this signal was due to the gene-level *SLC30A8* and  
518 *PAM* associations ( $p=0.082$  for the other nine genes). By contrast, the transcript-  
519 association based gene set did not exhibit a significant association ( $p=0.72$ ).

520

521 Extending this analysis, we curated a list of 94 T2D GWAS loci, and 595 genes that  
522 lay within 250 kb of any T2D GWAS index variant, from a 2016 T2D genetics  
523 review<sup>53</sup>. Among these 595 genes, 40 achieved a  $p < 0.05$  gene-level signal  
524 (**Supplementary Table 11**), greater than the  $595 \times 0.05 = 29.75$  expected by chance  
525 ( $p = 0.038$ ). These 40 genes had among them significantly more indirect protein-  
526 protein interactions (DAPPLE<sup>54</sup>  $p = 0.03$ ; observed mean = 11.4, expected mean = 4.5)  
527 than did the 184 genes implicated based on proximity to GWAS tag SNPs (DAPPLE  
528  $p = 0.64$ ), consistent with a gene set of greater biological coherence. Rare coding  
529 variants could therefore, in principle, complement common variant fine mapping<sup>6,55</sup>  
530 and experimental data<sup>7,56</sup> to help interpret T2D GWAS associations, although our  
531 results indicate that much larger sample sizes will be required to clearly implicate  
532 specific effector genes.

533

534 Finally, we assessed whether gene-level analysis could help predict whether gene  
535 inactivation increases or decreases T2D risk (i.e. the T2D “directional  
536 relationship”<sup>18,19</sup>). For each gene set, we compared the ORs estimated from gene-  
537 level weighted analysis of predicted damaging coding alleles (**Methods**) to  
538 directional relationships previously reported. Gene-level ORs were 100%  
539 concordant with the known relationships for the set of eight T2D drug targets (4/4  
540 inhibitor targets  $OR < 1$ , 4/4 agonist targets  $OR > 1$ ; one-sided binomial  $p = 3.9 \times 10^{-3}$ ;  
541 **Figure 2f**).

542



543 Conversely, concordances between gene-level OR estimates and mouse knockout  
544 observations were more equivocal (7/11 diabetes genes with OR>1, binomial  
545  $p=0.27$ ; 137/240 increased circulating glucose genes with OR>1,  $p=0.016$ ;  
546 **Supplementary Figure 17**). The relatively low concordances for these gene sets,  
547 despite a clear trend toward lower-than-expected gene-level  $p$ -values within them  
548 (**Supplementary Figure 15**), highlight how coding variants might be used to assess  
549 seemingly promising preclinical results (particularly given the known limitations of  
550 animal models<sup>57,58</sup>). For example, the protective gene-level *ATM* signal we observe  
551 (burden test of PTVs OR=0.50,  $p=0.003$ ) questions previous expectations, based on  
552 insulin resistance and impaired glucose tolerance in *Atm* knockout mice<sup>59</sup>, that *ATM*  
553 loss-of-function should increase T2D risk. Evidence is even less favorable that *ATM*  
554 haploinsufficiency strongly increases T2D risk, rejecting (for example) OR>2 at  
555  $p=1.3\times 10^{-8}$ . This observation could be relevant in the ongoing characterization of  
556 *ATM* as a potential metformin target<sup>60-62</sup> or if *ATM* activators are considered to treat  
557 cardiovascular disease<sup>63</sup>.

558

### 559 **Comparison of rare and common variants in T2D genetic analyses**

560

561 The substantial number of rare coding variant T2D associations we observed  
562 prompted us to re-evaluate arguments<sup>13,14,16,64</sup> about their value in genetic studies  
563 relative to common variants, which have the advantage of being efficiently studied  
564 (in many more samples than currently can be sequenced) through array-based  
565 association studies<sup>55,65</sup>. While recent studies have emphasized the main

566 contribution of common variants to T2D heritability<sup>17,21,24,66</sup>, they have lacked  
567 power to fully evaluate the relative merits of rare versus common variants (or, by  
568 implication, sequencing versus array-based studies) to discover disease-associated  
569 loci, explain disease heritability, or elucidate allelic series.

570

571 For a fair comparison of discoveries possible from sequencing and array-based  
572 studies, we collected genome-wide array data within the same individuals we  
573 sequenced (available for 34,529 [76.3% of] individuals; 18,233 cases and 17,679  
574 controls). We then imputed variants using best-practice reference panels<sup>67,68</sup> and  
575 conducted single-variant analysis following the same protocol as for the sequence  
576 data (“imputed GWAS”; **Supplementary Table 12, Methods**). Eight of the ten  
577 exome-wide significant nonsynonymous single-variant associations from our  
578 sequence analysis were detectable in the imputed GWAS analysis, together with  
579 genome-wide significant noncoding variant associations in 14 additional loci  
580 (**Figure 3a, Supplementary Table 13**). All ten single-variant sequence associations  
581 were also present on the Illumina Exome Array (**Methods**), implying the ability of  
582 array-based association studies to detect exome-wide significant single-variant  
583 associations at equivalent significance and at far less cost than exome sequence  
584 association studies.

585

586 We next compared the contributions to T2D heritability from the strongest  
587 (common) single-variant associations from the imputed GWAS to those from the  
588 strongest (mostly rare variant) gene-level associations from the sequence analysis.

589 Using a genetic liability model<sup>69</sup> in which all damaging variants in a gene have the  
590 same direction of effect (**Methods**), the three exome-wide significant gene-level  
591 signals explain an estimated 0.11% (*MC4R*), 0.092% (*PAM*), and 0.072% (*SLC30A8*)  
592 of T2D genetic variance. These estimates are only 10-20% of the variances  
593 explained by the three strongest independent common variant associations in the  
594 imputed GWAS of the same samples (*TCF7L2*, 0.89%; *KCNQ1*, 0.81%; and *CDC123*,  
595 0.35%) and if anything overstate the heritability explained by rare variants in the  
596 gene-level signals, since the *MC4R* and *PAM* estimates are attributable mostly to the  
597 low-frequency p.Ile269Asn (70.9% of the gene-level total) and p.Asp563Gly (83.3%)  
598 alleles. We obtained similar results in a broader comparison between all (19)  
599 previously identified index SNPs achieving  $p < 5 \times 10^{-8}$  in the imputed GWAS and the  
600 top 19 gene-level signals from our sequence analysis (**Figure 3b**).

601

602 These results argue against a large contribution to T2D heritability from rare  
603 variants in the strongest observed gene-level signals, with one caveat: as gene-level  
604 tests may include benign alleles that can dilute evidence for association, their  
605 aggregate effects might underestimate the true contribution of rare functional  
606 variants to T2D heritability<sup>12</sup>. However, when we analyzed all possible subsets of  
607 variation in the three most significant gene-level signals (**Methods**), none explained  
608 more than 20% of the heritability of the single-variant *TCF7L2* association  
609 (maximum of 0.18% for *MC4R*, 0.15% for *PAM*, 0.17% for *SLC30A8*).

610

611 We finally assessed whether an array-based study could have detected the allelic  
612 series we observed from exome sequence analysis. Among the variants contributing  
613 to the exome-wide significant gene-level associations in *SLC30A8*, *MC4R*, and *PAM*,  
614 95.3% were not imputable ( $r^2 > 0.4$ ; **Methods**) from the 1000 Genomes multi-  
615 ancestry reference panel<sup>67</sup>, and 74.6% of those in Europeans were not imputable  
616 from the larger European-focused Haplotype Reference Consortium panel<sup>68</sup>.  
617 Similarly, 90.2% of variants (79.7% of European variants) are absent from the  
618 Illumina Exome Array.

619

620 Additionally, gene set associations using gene “scores”<sup>70</sup> (**Methods**) from imputed  
621 GWAS associations were suggestive (four gene sets achieving  $p < 0.05$ , nine achieving  
622  $p < 0.1$ ; **Supplementary Figure 18**) but weaker than gene set associations from our  
623 sequence analysis. Some of these gene set associations can be recaptured in larger  
624 array-based studies: scores from a published multi-ancestry GWAS of ~110K  
625 samples produced  $p < 0.05$  for 12 of the 16 gene sets we studied (**Supplementary**  
626 **Figure 19, Methods**). However, even here the genes (and corresponding variants)  
627 responsible for the gene set associations were broadly different between the array  
628 and sequence-based studies, as the two methods often produced uncorrelated rank-  
629 orderings of genes within gene sets (e.g.  $r = -0.11$ ,  $p = 0.57$  for the mouse diabetes gene  
630 set; **Figure 3c**). Collectively, these results argue that array-based GWAS and exome  
631 sequencing are complementary, favoring locus discovery and enabling full  
632 enumeration of potentially informative alleles, respectively.

633

634 **Use of nominally significant associations in translational decision support**

635

636 The T2D drug targets we analyzed exemplify the opportunities and challenges of  
637 using current exome sequence datasets in translational research. Gene-level  
638 associations are significant across these targets as a set (**Figure 2b**), and rare  
639 variants predict the correct disease directional relationship for each gene (**Figure**  
640 **2f**). However, rare variant gene-level signals for these genes are nowhere near  
641 detectable at exome-wide significance in our current sample size: 80% power would  
642 require 110,000-180,000 sequenced cases (220,000-360,000 exomes in a balanced  
643 study, equivalent in effective sample size to 750,000-1,200,000 exomes from a  
644 population with T2D prevalence 8%; **Figure 4a**).

645

646 Consequently, many of the more modest associations (e.g.  $p=0.05$ ) in current sample  
647 sizes may in fact point to therapeutically relevant variants or genes  
648 (**Supplementary Figure 20**)<sup>71,72</sup>. If the false positive rate for these associations –  
649 which is expected to be greater than that for associations exceeding exome-wide  
650 significance<sup>71-73</sup> – can be quantified<sup>74,75</sup>, then a modest association signal may  
651 motivate further experimentation on a gene while complete absence of an  
652 association may reduce enthusiasm for its study. For example, the expected value of  
653 the experiment can be calculated based on the likelihood of true association, the  
654 cost of the experiment, and the benefit of its success<sup>76,77</sup> (**Figure 4b**).

655

656 We sought to quantify the false positive association rate for nonsynonymous  
657 variants observed in our dataset, depending on the  $p$ -value observed in single-  
658 variant analysis. We developed a method to use the consistency of single-variant  
659 association statistics between our sequence analysis and a previous<sup>24</sup> exome array  
660 study (re-analyzed to include only the 41,967 individuals not in our current study;  
661 **Methods**), together with published estimates of the fraction of nonsynonymous  
662 associations that are causal for disease<sup>17,78,79</sup>, to estimate the posterior probability  
663 of true and causal association (PPA) for variants reaching different levels of  
664 statistical significance. We provide an overview of this method in **Figure 4c-f**, a  
665 detailed description in **Methods**, and its sensitivity to modeling assumptions in  
666 **Supplementary Figure 21**.

667

668 We applied this method to three classes of variants: genome-wide, within T2D  
669 GWAS loci, and within genes implicated in T2D through prior (non-genetic)  
670 evidence. Model parameters in the middle of the range we explored (**Methods**)  
671 predict that 1.5% (95% CI: 0.74%-2.2%) of nonsynonymous variants that achieve  
672  $p < 0.05$  are truly and causally associated with T2D, increasing to 3.6% (1.4%-5.9%)  
673 for variants with  $p < 0.005$ , and 9.7% (3.9%-15.0%) for variants with  $p < 5 \times 10^{-4}$   
674 (**Supplementary Figure 22**). Under this model, 541 (270-810) of the 36,604  
675 nonsynonymous variants with  $p < 0.05$  in our dataset represent true and causal  
676 associations.

677

678 Within the set of 94 T2D GWAS loci, we observed evidence of a greater enrichment  
679 of true associations: 61.3% of nonsynonymous variants achieving sequence  $p < 0.05$   
680 were directionally consistent in the independent exome array analysis (compared to  
681 51.9% outside of GWAS loci). We re-calculated a mapping between sequence single-  
682 variant  $p$ -value and PPA using only nonsynonymous variants within these loci. The  
683 resulting model predicts that 2.0% (0.048%-4.0%) of such variants overall, 8.1%  
684 (3.6%-12.4%) with sequence  $p < 0.05$ , and 17.2% (7.7%-24.1%) with sequence  
685  $p < 0.005$  represent true and causal T2D associations. This suggests that our dataset  
686 contains a large number of potentially strong-effect variants in T2D GWAS loci  
687 achieving nominal significance: of 1059 variants with  $p < 0.05$ , we estimate roughly  
688 60 (26-93) of 746 with estimated  $OR > 2$  and 41 (18-63) of 503 with estimated  $OR > 3$   
689 are true and causal associations (**Supplementary Tables 14-15**).

690

691 Beyond GWAS loci, many other genes have evidence – for example from animal<sup>80</sup> or  
692 cellular studies<sup>50,56</sup> – that may lead a researcher to (often subjectively) believe they  
693 are involved in T2D pathogenesis. We extended our approach for PPA estimation to  
694 incorporate prior evidence that a gene is relevant to T2D<sup>81</sup>, calibrating it from a  
695 model of the prior association likelihood within T2D GWAS loci (**Figure 4e-f**;  
696 **Methods**). Under our model (**Supplementary Table 16**), a prior belief that a gene  
697 has (for example) probability 25% of being involved with T2D yields estimates that  
698 variants within it achieving  $p < 0.05$  and  $p < 0.005$  have 10.7% and 26.2%  
699 probabilities of being true and causal T2D associations.

700

701 In the future, these PPA calculations could be extended to gene-level associations,  
702 which would avoid conflicting results among variants within a gene but require  
703 larger-scale gene-level replication data than we had available. Additional work  
704 could also develop data and methods to estimate objective, rather than subjective,  
705 gene priors and reduce dependence of our conclusions on modeling assumptions  
706 (**Supplementary Figure 21**). Still, these PPA calculations provide a useful initial  
707 framework to use genetic signals to support cost/benefit estimates of “go/no-go”  
708 decisions<sup>82</sup> in the language of decision theory<sup>76,77</sup> (**Figure 4b**). To support use of this  
709 strategy, we have made our exome sequence association results publically available  
710 through the AMP T2D Knowledge Portal ([www.type2diabetesgenetics.org](http://www.type2diabetesgenetics.org)), which  
711 supports querying of all pre-computed single-variant associations and allows users  
712 to dynamically compute single-variant and gene-level associations according to  
713 custom covariates and criteria for sample and variant filtering.

714

## 715 **Discussion**

716

717 Our results paint a nuanced picture of rare variation and T2D, which may also apply  
718 to other complex diseases with similar genetic architectures<sup>83</sup>. Our gene set analyses  
719 show that rare variant gene-level signals are likely widely distributed across  
720 numerous genes, but the vast majority explain, individually, vanishing amounts of  
721 T2D heritability – evinced by the >1M samples likely required to detect exome-wide  
722 significant rare variant signals in validated therapeutic targets. Gene-level signals  
723 that do reach exome-wide significance in our analysis (such as those in *MC4R* and



724 *PAM*) are noteworthy not because they include unusually strong rare variant  
725 associations but because they include typical rare variant associations boosted from  
726 nominal to exome-wide significance by low frequency variant(s) – which,  
727 empirically, can also be detected by array-based studies. Therefore, for many  
728 complex traits (particularly those with modest selective pressure like T2D), the  
729 primary value of exome sequencing beyond array-based GWAS may be to aid  
730 experimental gene characterization<sup>84</sup> by identifying a broad series of rare coding  
731 alleles – ideally through multi-ancestry samples to capture as broad a set of alleles  
732 as possible – rather than to discover new disease loci. Whole-genome sequencing  
733 will likely, one day, become sufficiently cost effective to subsume both array-based  
734 GWAS and exome sequencing; even now, it is at minimum an essential means to  
735 expand imputation reference panels to power genetic discovery from GWAS.  
736  
737 Our results also outline a strategy for using exome sequence data to prioritize or  
738 validate genes under study by biologists or pharmaceutical industry scientists.  
739 We have presented a principled and empirically calibrated Bayesian approach  
740 (**Figure 4, Supplementary Table 16**) to estimate the association probability for  
741 any variant in our dataset. While currently limited by available data and modeling  
742 assumptions, it provides a first step to increase the interpretability of exome  
743 sequence associations even absent exome-wide significance. Results and customized  
744 analyses from our study can be accessed through a public web portal  
745 ([www.type2diabetesgenetics.org](http://www.type2diabetesgenetics.org)), advancing the vision to broadly use exome  
746 sequence data across many avenues of biomedical research.

747 **Figure legends**

748

749 **Figure 1: Exome-wide association analysis. (a)** A Manhattan plot of exome  
750 sequence single-variant associations. Genes closest to variants achieving  $p < 4.3 \times 10^{-7}$   
751 (red line; at most one per each 250KB region) are labeled. **(b)** A Manhattan plot of  
752 gene-level associations;  $p$ -values shown are the minimum across the four gene-level  
753 analyses after correction for four analyses (**Methods**), with the most significant  
754 genes labeled. Red line:  $p = 6.5 \times 10^{-7}$ . **(c)** Gene-level association  $p$ -values for *SLC30A8*,  
755 using the burden test on alleles in the 1/5 1% mask (the mask, as defined in  
756 **Methods**, achieving greatest statistical significance for *SLC30A8*), after progressive  
757 removal of variants in order of increasing single-variant association  $p$ -value. The left  
758 y-axis (black line) shows the progressive gene-level  $p$ -value, the dashed line  $p = 0.05$ .  
759 The right y-axis (blue line) shows the estimated effect size ( $\log_{10}(\text{OR})$ ), with shaded  
760 blue indicating the 95% confidence interval and dotted line indicating effect size = 0.  
761 **(d)** Variants observed in *SLC30A8* within 1/5 1% mask. Variants are colored blue (if  
762  $\text{OR} < 1$ ) or red ( $\text{OR} > 1$ ). Case (red) and control (blue) frequencies are shown for  
763 each variant, with black boxes shaded according to the contribution of each variant  
764 to the gene-level signal (computed by the difference in  $\log_{10}(p\text{-value})$  after removal  
765 of the variant from the test). OR: odds ratio.

766

767 **Figure 2: Gene set analysis. (a-e)** Box plots of the rank percentiles (1 being the  
768 highest) for gene-level associations within **(a)** 11 genes implicated in Maturity  
769 Onset Diabetes of the Young (MODY); **(b)** 8 genes annotated in the DrugBank

770 database as the primary targets of T2D medications; **(c)** 31 genes annotated in the  
771 Mouse Genome Informatics (MGI) database as harboring knockout mutations  
772 causing non-insulin dependent diabetes; **(d)** 323 genes annotated in the MGI  
773 database as harboring knockout mutations causing impaired glucose tolerance in  
774 mice; and **(e)** 11 genes with strong genetic evidence for harboring common causal  
775 coding variants. *P*-values correspond to a one-sided Wilcoxon Rank-Sum test  
776 comparing the associations to those of matched comparison genes. **(f)** Estimated  
777 odds ratios (OR) of deleterious nonsynonymous variants in the eight T2D drug  
778 targets. Targets of agonists are colored red and targets of inhibitors are colored  
779 blue. Error bars indicate one standard error.

780

781 **Figure 3: Comparison of exome sequencing to array-based GWAS. (a)** A

782 Manhattan plot of single-variant associations in an array-based imputed GWAS of  
783 the subset (76%) of the samples in the exome sequence analysis for which array  
784 data were available. Labels and y-axis are equivalent to **Figure 1a. (b)** The observed  
785 liability variance explained (LVE) by the top 19 gene-level associations from the  
786 exome sequence analysis (red; Exomes) and the top 19 single-variant associations  
787 (considering only one per 250kb) from the imputed GWAS (blue; Imputed GWAS),  
788 as well as their ratio (black; Ratio). Signals are ranked by LVE rather than *p*-value.

789 **(c)** A comparison of gene rank percentiles according to exome sequence gene-level  
790 analysis (x-axis) and gene rank percentiles according to proximity to GWAS signals  
791 from a published transethnic T2D GWAS (y-axis; **Methods**). Genes shown are from

792 the set of 31 genes implicated in non-insulin dependent diabetes from knockout  
793 mice (the set in **Figure 2c**).

794

795 **Figure 4: Translational decision support from exome sequence data. (a)**

796 Estimated power, as a function of future sample size, to detect T2D gene-level  
797 associations (at significance  $p=6.25\times 10^{-7}$ ) with aggregate frequency and odds ratios  
798 equal to those estimated from our analysis in eight established T2D drug targets (**in**

799 **Figure 2f**). **(b)** A proposed workflow for using exome sequence data in gene  
800 characterization. Depending on the prior belief in the disease-relevance of the gene,  
801 the cost of experimental characterization, and the benefit of validating the gene, a  
802 decision to conduct a further experiment could be informed by the probability that  
803 the gene is relevant to disease, as estimated from exome sequence association  
804 statistics (available through [www.type2diabetesgenetics.org](http://www.type2diabetesgenetics.org)). **(c-f)** To support this

805 workflow, we estimated the posterior probability of true and causal association  
806 (PPA) for nonsynonymous variants in our sequence analysis based on **(c)**

807 concordance with independent exome chip data and published estimates of the  
808 fraction of causal coding associations (**Methods**). **(d)** PPA estimates for

809 nonsynonymous variants within T2D GWAS loci are shown as a function of p-value  
810 (right y-axis, black; 95% confidence interval, gray) together with the total number of

811 such variants (left y-axis, red). For variants outside of T2D GWAS loci, we developed  
812 a method to further compute **(e)** Bayes factors, which measure the odds of true and

813 causal association, as a function of p-value, using a model of the prior odds of true

814 and causal association for variants in GWAS loci (**Methods**). These Bayes factors can

815 be **(f)** combined with a subjective prior belief in the T2D-relevance of a gene (y-axis)  
816 to produce the estimated posterior probability of true and causal association for any  
817 nonsynonymous variant in the exome sequence dataset based on its observed  
818  $\log_{10}(p\text{-value})$  (x-axis). Posterior estimates are shaded proportional to value (red:  
819 low; white: high). Values shown are for the default modeling assumptions of 33% of  
820 missense variants causing gene inactivation and 30% of true missense associations  
821 representing the causal variant.

822 **Funding**

823 **Broad Institute, USA:** Sequencing for T2D-GENES cohorts was funded by the  
824 National Institute of Diabetes and Digestive and Kidney Diseases (NIDDK) grant  
825 U01DK085526: Multiethnic Study of Type Diabetes Genes and National Human  
826 Genome Research Institute (NHGRI) grant U54HG003067: Large Scale Sequencing  
827 and Analysis of Genomes.

828 Sequencing for GoT2D cohorts was funded by National Institute of Health (NIH)  
829 1RC2DK088389: Low-Pass Sequencing and High Density SNP Genotyping in Type 2  
830 Diabetes.

831 Sequencing for ProDiGY cohorts was funded by National Institute of Diabetes and  
832 Digestive and Kidney Diseases (NIDDK) U01DK085526.

833 Sequencing for SIGMA cohorts was funded by the Carlos Slim Foundation: Slim  
834 Initiative in Genomic Medicine for the Americas (SIGMA).

835 Analysis was supported by the National Institute of Diabetes and Digestive and  
836 Kidney Diseases (NIDDK) grant U01 DK105554: AMP T2D-GENES Data  
837 Coordination Center and Web Portal.

838 **The Mount Sinai IPM Biobank Program** is supported by The Andrea and Charles  
839 Bronfman Philanthropies.

840 The **Wake Forest study** was supported by NIH R01 DK066358.

841 **Oxford** cohorts and analysis is funded by: The European Commission (ENGAGE:  
842 HEALTH-F4-2007-201413); MRC (G0601261, G0900747-91070); National  
843 Institutes of Health (RC2-DK088389, DK085545, R01-DK098032, U01-DK105535);  
844 Wellcome Trust (064890, 083948, 085475, 086596, 090367, 090532, 092447,  
845 095101, 095552, 098017, 098381, 100956, 101630, 203141)

846 The **FUSION** study is supported by NIH grants DK062370 and DK072193.

847 The research from the **Korean cohort** was supported by a grant of the Korea Health  
848 Technology R&D Project through the Korea Health Industry Development Institute  
849 (KHIDI), funded by the Ministry of Health & Welfare, Republic of Korea (grant  
850 number: HI14C0060, HI15C1595).

851 **The Malmö Preventive Project and the Scania Diabetes Registry** were  
852 supported by a Swedish Research Council grant (Linné) to the Lund University  
853 Diabetes Centre.

854 **The Botnia and The PPP-Botnia studies** (L.G., T.T.) have been financially  
855 supported by grants from Folkhälsan Research Foundation, the Sigrid Juselius  
856 Foundation, The Academy of Finland (grants no. 263401, 267882, 312063 to LG,  
857 312072 to TT), Nordic Center of Excellence in Disease Genetics, EU (EXGENESIS,  
858 EUFP7-MOSAIC FP7-600914), Ollqvist Foundation, Swedish Cultural Foundation in  
859 Finland, Finnish Diabetes Research Foundation, Foundation for Life and Health in  
860 Finland, Signe and Ane Gyllenberg Foundation, Finnish Medical Society, Paavo  
861 Nurmi Foundation, Helsinki University Central Hospital Research Foundation,

862 Perklén Foundation, Närpes Health Care Foundation and Ahokas Foundation. The  
863 study has also been supported by the Ministry of Education in Finland, Municipal  
864 Health Care Center and Hospital in Jakobstad and Health Care Centers in Vasa,  
865 Närpes and Korsholm. The skilful assistance of the Botnia Study Group is gratefully  
866 acknowledged.

867 **The Jackson Heart Study (JHS)** is supported by contracts HHSN268201300046C,  
868 HHSN268201300047C, HHSN268201300048C, HHSN268201300049C,  
869 HHSN268201300050C from the National Heart, Lung, and Blood Institute and the  
870 National Institute on Minority Health and Health Disparities. Dr. Wilson is supported  
871 by U54GM115428 from the National Institute of General Medical Sciences.

872 **The Diabetic Cohort (DC) and Multi-Ethnic Cohort (MEC)** were supported by  
873 individual research grants and clinician scientist award schemes from the National  
874 Medical Research Council (NMRC) and the Biomedical Research Council (BMRC) of  
875 Singapore.

876 **The Diabetic Cohort (DC), Multi-Ethnic Cohort (MEC), Singapore Indian Eye  
877 Study (SINDI) and Singapore Prospective Study Program (SP2)** were supported  
878 by individual research grants and clinician scientist award schemes from the  
879 National Medical Research Council (NMRC) and the Biomedical Research Council  
880 (BMRC) of Singapore.

881 **The Longevity study at Albert Einstein College of Medicine, USA** was funded by  
882 The American Federation for Aging Research, the Einstein Glenn Center, and



883 National Institute on Aging (P01AG027734, R01AG046949, 1R01AG042188,  
884 P30AG038072).

885 **The TwinsUK study** was funded by the Wellcome Trust and European  
886 Community's Seventh Framework Programme (FP7/2007-2013). The TwinsUK  
887 study also receives support from the National Institute for Health Research (NIHR)-  
888 funded BioResource, Clinical Research Facility and Biomedical Research Centre  
889 based at Guy's and St Thomas' NHS Foundation Trust in partnership with King's  
890 College London.

891 **Framingham Heart Study** is supported by NIH contract NHLBI N01-HC-25195 and  
892 HHSN268201500001I. This research was also supported by NIA AG08122 and  
893 AG033193, NIDDK U01 DK085526, U01 DK078616 and K24 DK080140, NHLBI R01  
894 HL105756, and grant supplement R01 HL092577-06S1 for this research. We also  
895 acknowledge the dedication of the FHS study participants without whom this  
896 research would not be possible.

897 **The Mexico City Diabetes Study** has been supported by the following grants:  
898 R01HL 24799 from the National Heart, Lung, and Blood Institute; Consejo Nacional  
899 de Ciencia y Tecnología a 2092, M9303, F677-M9407, 251M, 2005-C01-14502, and  
900 SALUD 2010-2151165; and Consejo Nacional de Ciencia y Tecnología (CONACyT)  
901 [Fondo de Cooperación Internacional en Ciencia y Tecnología a (FONCICYT) C0012-  
902 2014-01-247974.

903 The **KARE cohort** was supported by grants from Korea Centers for Disease Control  
904 and Prevention (4845–301, 4851–302, 4851–307), and an intramural grant from  
905 the Korea National Institute of Health (2016-NI73001-00).

906 **The Diabetes in Mexico Study** was supported by Consejo Nacional de Ciencia y  
907 Tecnología grant number S008-2014-1-233970 and by Instituto Carlos Slim de la  
908 Salud, AC.

909 **The Atherosclerosis Risk in Communities study** has been funded in whole or in  
910 part with Federal funds from the National Heart, Lung, and Blood Institute, National  
911 Institutes of Health, Department of Health and Human Services (contract numbers  
912 HHSN268201700001I, HHSN268201700002I, HHSN268201700003I,  
913 HHSN268201700004I and HHSN268201700005I). The authors thank the staff and  
914 participants of the ARIC study for their important contributions. Funding support  
915 for “Building on GWAS for NHLBI-diseases: the U.S. CHARGE consortium” was  
916 provided by the NIH through the American Recovery and Reinvestment Act of 2009  
917 (ARRA) (5RC2HL102419). CHARGE sequencing was carried out at the Baylor  
918 College of Medicine Human Genome Sequencing Center (U54 HG003273 and  
919 R01HL086694). Funding for GO ESP was provided by NHLBI grants RC2 HL-103010  
920 (HeartGO) and exome sequencing was performed through NHLBI grants RC2 HL-  
921 102925 (BroadGO) and RC2 HL-102926 (SeattleGO).

922 The infrastructure for the Analysis Commons is supported by R01HL105756  
923 (NHLBI, B.M.P.), U01HL130114 (NHLBI, B.M.P.) and 5RC2HL102419 (NHLBI, E.B.).

924 **The NHLBI Exome Sequencing Project (ESP)** was supported through the NHLBI  
925 Grand Opportunity (GO) program and funded through by grants RC2 HL103010  
926 (HeartGO), RC2 HL102923 (LungGO), and RC2 HL102924 (WHISP) for providing  
927 data and DNA samples for analysis. The exome sequencing for the NHLBI ESP was  
928 supported by NHLBI grants RC2 HL102925 (BroadGO) and RC2 HL102926  
929 (SeattleGO).

930 This research was supported by the **Multi-Ethnic Study of Atherosclerosis (MESA)**  
931 contracts HHSN268201500003I, N01-HC-95159, N01-HC-95160, N01-HC-95161,  
932 N01-HC-95162, N01-HC-95163, N01-HC-95164, N01-HC-95165, N01-HC-95166,  
933 N01-HC-95167, N01-HC-95168, N01-HC-95169, UL1-TR-000040, UL1-TR-001079,  
934 and UL1-TR-001420. The provision of genotyping data was supported in part by the  
935 National Center for Advancing Translational Sciences, TSCI grant UL1TR001881,  
936 and the National Institute of Diabetes and Digestive and Kidney Disease Diabetes  
937 Research (DRC) grant DK063491.

938 **The San Antonio Mexican American Family Studies (SAMAFS)** are supported by  
939 the following grants/institutes. The San Antonio Family Heart Study (SAFHS) and  
940 San Antonio Family Diabetes/Gallbladder Study (SAFDGS) were supported by U01  
941 DK085524, R01 HL0113323, P01 HL045222, R01 DK047482, and R01 DK053889.  
942 The Veterans Administration Genetic Epidemiology Study (VAGES) study was  
943 supported by a Veterans Administration Epidemiologic grant. The Family  
944 Investigation of Nephropathy and Diabetes - San Antonio (FIND-SA) study was

945 supported by NIH grant U01 DK57295. The SAMAFS research team acknowledges  
946 late Dr. Hanna E. Abboud's contributions to the research activities of the SAMAFS.  
947 Samples collection, research and analysis from the **Hong Kong Diabetes Register**  
948 **(HKDR)** at the **Chinese University of Hong Kong (CUHK)** were supported by the  
949 Hong Kong Foundation for Research and Development in Diabetes established  
950 under the auspices of the Chinese University of Hong Kong, the Hong Kong  
951 Government Research Grants Committee Central Allocation Scheme (CUHK 1/04C),  
952 a Research Grants Council Earmarked Research Grant (CUHK4724/07M), the  
953 Innovation and Technology Fund (ITS/088/08 and ITS/487/09FP), and the  
954 Research Grants Committee Theme-based Research Scheme (T12-402/13N).

955 **The TODAY** contribution to this study was completed with funding from NIDDK and  
956 the NIH Office of the Director (OD) through grants U01-DK61212, U01-DK61230,  
957 U01-DK61239, U01-DK61242, and U01-DK61254; from the National Center for  
958 Research Resources General Clinical Research Centers Program grant numbers  
959 M01-RR00036 (Washington University School of Medicine), M01-RR00043-45  
960 (Children's Hospital Los Angeles), M01-RR00069 (University of Colorado Denver),  
961 M01-RR00084 (Children's Hospital of Pittsburgh), M01-RR01066 (Massachusetts  
962 General Hospital), M01-RR00125 (Yale University), and M01-RR14467 (University  
963 of Oklahoma Health Sciences Center); and from the NCRR Clinical and Translational  
964 Science Awards grant numbers UL1-RR024134 (Children's Hospital of  
965 Philadelphia), UL1-RR024139 (Yale University), UL1-RR024153 (Children's  
966 Hospital of Pittsburgh), UL1-RR024989 (Case Western Reserve University), UL1-

967 RR024992 (Washington University in St Louis), UL1-RR025758 (Massachusetts  
968 General Hospital), and UL1-RR025780 (University of Colorado Denver). The content  
969 is solely the responsibility of the authors and does not necessarily represent the  
970 official views of the National Institutes of Health.

## 971 **Acknowledgements**

972 Ruth Loos is supported by the NIH (R01DK110113, U01HG007417, R01DK101855,  
973 R01DK107786).

974 Andrew P Morris is supported by the NIH-NIDDK (U01 DK105535); and a Wellcome  
975 Trust Senior Fellow in Basic Biomedical Science (award WT098017).

976 Jose C Florez is an MGH Research Scholar and is supported by NIDDK K24  
977 DK110550.

978 Graeme I Bell is supported by P30 DK020595.

979 Michigan State University is supported by NIH Grant 1K23DK114551-01.

980 Mark I McCarthy is a Wellcome Trust Senior Investigator (WT098381); and a  
981 National Institute of Health Research (NIHR) Senior Investigator. The views  
982 expressed in this article are those of the author(s) and not necessarily those of the  
983 NHS, the NIHR, or the Department of Health.

984 Yoon Shin Cho acknowledged support from the National Research Foundation of  
985 Korea (NRF) grant (NRF-2017R1A2B4006508).

986 Ching-Yu Cheng is supported by Clinician Scientist Award (NMRC/CSA-  
987 SI/0012/2017) of the Singapore Ministry of Health's National Medical Research  
988 Council.

989 **LuCAMP:** We wish to thank A. Forman, T. H. Lorentzen and G. J. Klavsen for  
990 laboratory assistance, P. Sandbeck for data management, G. Lademann for  
991 secretarial support, and T. F. Toldsted for grant management. This project was  
992 funded by the Lundbeck Foundation and produced by The Lundbeck Foundation  
993 Centre for Applied Medical Genomics in Personalised Disease Prediction,  
994 Prevention, and Care ([www.lucamp.org](http://www.lucamp.org)). The Novo Nordisk Foundation Center for  
995 Basic Metabolic Research is an independent Research Center at the University of  
996 Copenhagen partially funded by an unrestricted donation from the Novo Nordisk  
997 Foundation ([www.metabol.ku.dk](http://www.metabol.ku.dk)). Further funding came from the Danish Council  
998 for Independent Research Medical Sciences. The Inter99 was initiated by Torben  
999 Jørgensen (principal investigator [PI]), Knut Borch-Johnsen (co-PI), Hans Ibsen, and  
1000 Troels F. Thomsen. The steering committee comprises the former two and Charlotta  
1001 Pisinger. The study was financially supported by research grants from the Danish  
1002 Research Council, the Danish Centre for Health Technology Assessment, Novo  
1003 Nordisk, the Research Foundation of Copenhagen County, the Ministry of Internal  
1004 Affairs and Health, the Danish Heart Foundation, the Danish Pharmaceutical  
1005 Association, the Augustinus Foundation, the Ib Henriksen Foundation, the Becket  
1006 Foundation, and the Danish Diabetes Association. Daniel Witte is supported by the  
1007 Danish Diabetes Academy, which is funded by the Novo Nordisk Foundation.

1008 We thank all study participants of the Diabetic Cohort (**DC**), Multi-Ethnic Cohort  
1009 (**MEC**), Singapore Indian Eye Study (**SINDI**) and Singapore Prospective Study  
1010 Program (**SP2**) for their contributions and the National University Hospital Tissue  
1011 Repository (**NUHTR**) for biospecimen sample storage.

1012 We thank the Jackson Heart Study (**JHS**) participants and staff for their  
1013 contributions to this work.

1014 This study was provided with biospecimens and data from the Korean Genome  
1015 Analysis Project (4845-301), the Korean Genome and Epidemiology Study (4851-  
1016 302), and the Korea Biobank Project (4851-307, KBP-2013-11 and KBP-2014-68)  
1017 that were supported by the Korea Centers for Disease Control and Prevention,  
1018 Republic of Korea.

1019 The **Pakistan Genomic Resource** (PGR) would like to thank all the study  
1020 participants for their participation. PGR is funded through endowments awarded to  
1021 CNCD, Pakistan.

1022 The **KORA** study was initiated and financed by the Helmholtz Zentrum München—  
1023 German Research Center for Environmental Health, which is funded by the German  
1024 Federal Ministry of Education and Research (BMBF) and by the State of Bavaria.  
1025 Furthermore, KORA research was supported within the Munich Center of Health  
1026 Sciences (MC-Health), Ludwig-Maximilians-Universität, as part of LMUinnovativ. For  
1027 this publication, biosamples from the KORA Biobank as part of the Joint Biobank  
1028 Munich (JBM) have been used.

1029 Ronald C Ma and Juliana C Chan acknowledged support from the Hong Kong  
1030 Research Grants Council Theme-based Research Scheme (T12-402/13N), Research  
1031 Grants Council General Research Fund (Ref. 14110415), the Focused Innovation  
1032 Scheme, the Vice-Chancellor One-off Discretionary Fund, the Postdoctoral  
1033 Fellowship Scheme of the Chinese University of Hong Kong, as well as the Chinese  
1034 University of Hong Kong-Shanghai Jiao Tong University Joint Research Collaboration  
1035 Fund. We would also like to thank all medical and nursing staff of the Prince of  
1036 Wales Hospital Diabetes Mellitus Education Centre, Hong Kong.

### 1037 **Author Contributions**

1038 **Leadership.** J.F., N.P.B., J.C.F., M.I.M., M.B. **Analysis team.** J.M.M., C.F., M.S.U.,  
1039 A.Mahajan, T.W.B., L.Chen, S.C., A.E., S.Hanks, A.U.J., K.M., A.N., A.J.P., N.W.R., N.R.R.,  
1040 H.M.S., J.M.T., R.P.W., L.J.S., A.P.M. **Project management/Support roles.** L.Caulkins,  
1041 R.K., M.C. **Data generation.** Broad Genomics Platform. **T2D-GENES.** A.C., R.A.D., S.G.,  
1042 S.Han, H.M.K., B.-J.K., H.A.K., J.K., J.Liu, K.L.M., M.C.N., M.P., R.S.V., C.S., W.Y.S., C.H.T.,  
1043 F.T., B.T., R.M.v.D., M.V., T.-Y.W., G.Atzmon, N.B., J.B., D.W.B., J.C.C., E.Chan, C.-Y.C.,  
1044 Y.S.C., F.S.C., R.D., B.G., J.S.K., S.H.K., M.L., D.M.L., E.S.T., J.T., J.G.W., E.Bottinger, J.C., J.D.,  
1045 P.F., M.Y.H., Y.J.K., J.-Y.L., J.Lee, R.L., R.C.M., A.D.M., C.N.P., K.S.P., A.R., D.S., X.S., Y.Y.T.,  
1046 C.L.H., G.Abecasis, G.I.B., N.J.C., M.S., R.S., J.B.M., D.A. **GoT2D.** V.L., L.L.B., L.G., P.N.,  
1047 T.D.S., T.T., K.S.S. **LuCAMP.** M.E.J., A.L., D.R.W., N.G., T.H., O.P. **ProDiGY.** L.D., K.L.D.,  
1048 M.K., E.M.-D., C.P., N.S., B.B., P.Z., D.D. **SIGMA.** C.C.-C., E.Córdova, M.E.G.-S., H.G.-O.,  
1049 J.M.M.-H., A.M.-H., E.M.-C., C.R.-M., C.Gonzalez, M.E.G., C.A.A.-S., C.H., B.E.H., L.O., T.T.-  
1050 L. **CHARGE.** J.W., E.Boerwinkle, J.A.B., J.S.F., N.L.H.-C., C.-T.L., A.K.M., A.C.M., B.M.P.,



1051 S.W., P.S.d.V., J.D., S.R.H., C.J.O'D., J.P., J.B.M. **Regeneron**. T.M.T., J.B.L., A.Marcketta,

1052 C.O'D., D.J.C., H.L.K., F.E.D., A.B., D.C. **KORA**. T.M.S., C.Gieger, T.M., K.S.

1053 **ESP**. E.Boerwinkle, M.G., N.L.H.-C., A.C.M., W.S.P., B.M.P., A.P.R., R.P.T., C.J.O'D., L.L.,

1054 S.R., J.I.R.

1055

1056 **Disclosures**

1057 Philip Zeitler is a consultant for Merck, Daichii-Sankyo, Boehringer-Ingelheim, and

1058 Janssen.

1059

1060 Bruce M Psaty serves on the DSMB of a clinical trial funded by Zoll LifeCor and on

1061 the Steering Committee of the Yale Open Data Access Project funded by Johnson &

1062 Johnson.

1063 **Methods**

1064 Sample selection

1065 We drew samples for exome sequencing from six consortia (**Supplementary Table**

1066 **1**):

- 1067 1. The T2D-GENES (Type 2 Diabetes Genetic Exploration by Next-generation  
1068 sequencing in multi-Ethnic Samples) consortium, an NIDDK-funded  
1069 international research consortium seeking to identify genetic variants for T2D  
1070 through multiethnic sequencing studies<sup>24</sup>.
- 1071 2. The Slim Initiative in Genomic Medicine for the Americas: Type 2 Diabetes  
1072 (SIGMA T2D), an international research consortium funded by the Carlos Slim  
1073 Foundation to investigate genetic risk factors of T2D within Mexican and Latin  
1074 American populations and translate those finding to improved methods of  
1075 treatment and prevention<sup>85</sup>.
- 1076 3. The Genetics of Type 2 Diabetes (GoT2D) consortium, an NIDDK-funded  
1077 international research consortium seeking to understand the allelic architecture  
1078 of T2D through low-pass whole-genome sequencing, deep exome sequencing,  
1079 and high-density SNP genotyping and imputation<sup>24</sup>.
- 1080 4. The Exome Sequencing Project (ESP), an NHLBI-funded research consortium to  
1081 investigate novel genes and mechanisms contributing to heart, lung, and blood  
1082 disorders through whole exome sequencing<sup>86</sup>.
- 1083 5. The Lundbeck Foundation Centre for Applied Medical Genomics in Personalised  
1084 Disease Prediction, Prevention, and Care (LuCamp) study, which researches  
1085 whole exome variation in Danish metabolic diseases including diabetes<sup>21</sup>.

1086 6. The ProDiGY (Progress in Diabetes Genetics in Youth) consortium, an NIDDK-  
1087 funded research consortium to investigate genetic variants for childhood T2D.  
1088 Each consortium provided individual-level information on T2D case-control status  
1089 according to study-specific criteria as well as key covariates including age, sex, and  
1090 BMI (**Supplementary Table 1**). In addition, several consortia provided data on  
1091 fasting glucose, 2-hour glucose following glucose challenge, and use of anti-  
1092 hyperglycemic medications. We excluded as controls individuals with a 2-hour  
1093 glucose value  $\geq 11.1$  mmol/L (which meets diagnostic criteria for T2D) or with any  
1094 two of the following features suggestive of T2D: fasting glucose  $\geq 7$  mmol/L,  
1095 hemoglobin A1c  $\geq 6.5\%$ , or recorded as taking an anti-hyperglycemic medication.  
1096 We opted to require two of the previous features since there is room for error in  
1097 each: fasting values used in T2D diagnostic criteria are required to represent at least  
1098 an eight-hour fast, accuracy varies across hemoglobin A1c assays, and anti-glycemic  
1099 medications are occasionally taken by non-diabetic individuals.

1100

1101 All samples were approved for use by their home institution's institutional review  
1102 board or ethics committee, as previously reported<sup>21,24,85,86</sup>. Samples newly  
1103 sequenced at The Broad Institute as part of T2D-GENES, SIGMA, and ProDiGY are  
1104 covered under Partners Human Research Committee protocol # 2017P000445/PHS  
1105 "Diabetes Genetics and Related Traits".

1106

1107 Availability of sequence data and phenotypes for this study is available via the  
1108 database of Genotypes and Phenotypes (dbGAP) and/or the European Genome-  
1109 phenome Archive, as indicated in **Supplementary Table 1**.

1110

### 1111 Sample Sequencing

1112 For roughly half the study participants (some of T2D-GENES<sup>24</sup>, GoT2D<sup>24</sup>, SIGMA-  
1113 T2D<sup>85</sup>, LuCAMP<sup>21</sup>, ESP<sup>86</sup>), exome sequence data were available from previous  
1114 studies. For these individuals (**Supplementary Table 1**), we obtained access to and  
1115 aggregated BAM files containing unaligned sequence reads, which were generated  
1116 and analyzed as previously described<sup>23,62,79,80</sup>.

1117

1118 For the remaining participants, de-identified DNA samples were sent to the Broad  
1119 Institute in Cambridge, MA, USA where samples with (a) sufficient total DNA  
1120 quantity and minimum DNA concentrations (as estimated by Picogreen) and (b)  
1121 high quality genotypes (as measured by a 24 SNP Sequenom iPLEX assay) were  
1122 advanced for subsequent sequencing. Library construction was performed as  
1123 previously described<sup>87</sup> with some slight modifications. Initial genomic DNA input  
1124 into shearing was reduced from 3µg to 50ng in 10µL of solution and enzymatically  
1125 sheared. For adapter ligation, dual-indexed Illumina paired end adapters were  
1126 replaced with palindromic forked adapters with unique 8 base index sequences  
1127 embedded within the adapter and added to each end.

1128

1129 In-solution hybrid selection was performed using the Illumina Rapid Capture

1130 Exome enrichment kit with 38Mb target territory (29Mb baited), including 98.3% of  
1131 the intervals in the Refseq exome database. Dual-indexed libraries were pooled into  
1132 groups of up to 96 samples prior to hybridization, with liquid handling automated  
1133 on a Hamilton Starlet Liquid Handling system. The enriched library pools were  
1134 quantified via PicoGreen after elution from streptavidin beads and then normalized  
1135 to a range compatible with sequencing template denature protocols.

1136

1137 Following sample preparation, the libraries prepared using forked, indexed  
1138 adapters were quantified using quantitative PCR (KAPA Biosystems), normalized to  
1139 2 nM, and pooled by equal volume using the Hamilton Starlet. Pools were then  
1140 denatured using 0.1 N NaOH. Denatured samples were diluted into strip tubes using  
1141 the Hamilton Starlet.

1142

1143 Cluster amplification of the templates was performed according to the  
1144 manufacturer's protocol (Illumina) using the Illumina cBot. Flowcells were  
1145 sequenced on HiSeq 4000 Sequencing-by-Synthesis Kits, then analyzed using  
1146 RTA2.7.3.

1147

#### 1148 Variant calling and quality control

1149 Sequencing reads for all samples (both newly sequenced and previously sequenced)  
1150 were processed and aligned to the human genome (build hg19) using the Picard  
1151 ([broadinstitute.github.io/picard/](http://broadinstitute.github.io/picard/)), BWA<sup>88</sup>, and GATK<sup>89</sup> software packages, following  
1152 best-practice pipelines; data from previously published studies were treated the

1153 same as data from the new study (i.e. beginning from unaligned reads) to ensure  
1154 uniformity of processing. Single nucleotide and short indel variants were then called  
1155 using a series of GATK commands (version nightly-2015-07-31-g3c929b0):  
1156 ApplyRecalibration, CombineGVCFs, CombineVariants, GenotypeGVCFs,  
1157 HaplotypeCaller, SelectVariants, and VariantFiltration. Variants were called within  
1158 50bp of any region targeted for capture in any sequenced cohort.

1159

1160 We computed hard calls (the GATK-called genotypes but set as missing at a  
1161 genotype quality [GQ] <20 threshold) and dosages (the expected alternate allele  
1162 count, defined as  $Pr(RX|data) + 2Pr(XX|data)$ , where R is the reference allele and X  
1163 the alternative allele) for each individual at each variant site. We used hard calls for  
1164 quality control and dosages in downstream association analyses. We computed  
1165 dosages on the X chromosome (outside of the pseudo-autosomal region) accounting  
1166 for sex, treating males as haploid.

1167

1168 To perform data quality control, we first calculated a range of metrics measuring  
1169 sample sequencing quality (**Supplementary Figure 2**). We then stratified samples  
1170 by ancestry and sequence capture technology and excluded from further analysis  
1171 samples that were outliers according to any metric, based on visual inspection by  
1172 comparison to other samples within the same stratum. A full list of metrics used for  
1173 exclusion and the number of samples excluded based on each metric is shown in  
1174 **Supplementary Table 2**.

1175

1176 After exclusion of samples, we calculated an additional set of variant metrics and  
1177 excluded any variant with overall call rate <0.3, heterozygosity of 1, or heterozygote  
1178 allele balance of 0 or 1 (i.e. 100% or 0% of reads called non-reference for  
1179 heterozygous genotypes). We intentionally chose these non-stringent initial variant  
1180 quality-control thresholds due to the heterogeneity of capture and sequencing  
1181 technologies used in our study; we performed much more stringent variant quality  
1182 control during single-variant or gene-level association analysis. We refer to the  
1183 49,484 samples and 7.02M variants passing this first round of non-stringent quality  
1184 control as the “clean” dataset.

1185

#### 1186 Additional quality control for association analysis in sequence data

1187 Following initial sample and variant quality control, we performed additional  
1188 exclusions of samples from association analysis. First, we computed a transethnic  
1189 set of “ancestry” SNPs for use in identity-by-descent (IBD) and principal component  
1190 (PC) analysis. We began this analysis with variants in the clean dataset (a) with  
1191 genotype call rate >95%, (b) with minor allele frequency (MAF) >1% in each  
1192 ancestry, and (c) further than 250Kb from the HLA region or an established T2D  
1193 association signal. We LD-pruned variants using PLINK<sup>90</sup> based on maximum  $r^2=0.2$   
1194 (parameters -indep-pairwise 50 5 0.2). We used the remaining 171K variants to  
1195 estimate pairwise individual IBD using PLINK, and the top 10 PCs of genetic  
1196 ancestry using EIGENSTRAT<sup>91</sup>. For each pair of individuals with IBD>0.9, we  
1197 excluded the individual with the lower call rate (337 duplicate exclusions in  
1198 **Supplementary Figure 2**). We then excluded, for each of the five ancestries, any

1199 individual who appeared, based on visual inspection of the first two transethnic PCs,  
1200 to lie outside of the main PC cluster corresponding to that ancestry (133 ethnic  
1201 outliers in **Supplementary Figure 2**). Finally, we used the subset of transethnic  
1202 ancestry SNPs on the X chromosome to compare genetic sex to reported sex, using  
1203 PLINK, and excluded all discordant individuals (273 sex discordances in  
1204 **Supplementary Figure 2**).

1205

1206 At this stage we also excluded the 3,510 childhood diabetes cases from the SEARCH  
1207 and TODAY studies. We initially hoped to include these samples as cases in both  
1208 single-variant and gene-level analysis, using either PCs or linear mixed models to  
1209 adjust for any ancestry differences between them and the other samples. However,  
1210 while single-variant association statistics (computed via a meta-analysis of  
1211 ancestry-level associations) remained well-calibrated with these studies included  
1212 (**Supplementary Figure 23ab**), gene-level analysis yielded a dramatically inflated  
1213 QQ plot (**Supplementary Figure 23cd**). Exclusion of the SEARCH and TODAY study  
1214 samples, samples failing quality control, and variants that became monomorphic as  
1215 a result of these sample exclusions, yielded an “analysis” dataset of 45,231  
1216 individuals and 6.33M variants.

1217

1218 After these three rounds of sample exclusions, we identified five sets of ancestry-  
1219 specific “ancestry” SNPs. We used the same procedure as for the transethnic  
1220 ancestry SNPs (described above), except that we applied the MAF threshold only  
1221 within the appropriate ancestry. We used these ancestry SNPs to estimate, for each



1222 ancestry, pairwise IBD values, genetic relatedness matrices (GRMs), and PCs for use  
1223 in downstream association analysis.

1224

1225 Additionally, from the IBD values, we generated a list of unrelated individuals within  
1226 each ancestry by excluding the individual with the lower call rate in any pair of  
1227 individuals with IBD>0.3 (leading to 2,157 excluded individuals). The resulting  
1228 “unrelateds analysis” set consisted of 43,090 individuals (19,828 cases and 23,262  
1229 controls) and yielded 6.29M non-monomorphic variants. We used this set of  
1230 individuals and variants for single-variant and gene-level tests (described below)  
1231 that required an unrelated set of individuals for analysis.

1232

1233 We carried out power calculations<sup>92</sup> for single-variant or gene-level tests assuming a  
1234 disease prevalence of 0.08 to convert population frequencies and ORs to case and  
1235 control frequencies, and a sample size (19,828 cases and 23,262 controls) from an  
1236 analysis of only unrelated individuals. Our power calculations assumed that allelic  
1237 effects were homogeneous across ancestries.

1238

#### 1239 Variant annotation

1240 We annotated variants with the ENSEMBL Variant Effect Predictor<sup>93</sup> (VEP, version  
1241 87). Annotations were produced for all ENSEMBL transcripts with the `-flag-pick-`  
1242 `allele` option used to assign a “best guess” annotation to each variant according to  
1243 the following ordered criteria for transcripts<sup>94</sup>: transcript support level (TSL, i.e.  
1244 supported by mRNA), biotype (i.e. `protein_coding`), APPRIS isoform annotation (i.e.

1245 principal), deleteriousness of annotation (i.e. prefer transcripts with higher impact  
1246 annotations), CCDS<sup>95</sup> status of transcript (i.e. a high-quality transcript set), canonical  
1247 status of transcript, and transcript length (i.e. longer preferred). We used the VEP  
1248 LofTee (<https://github.com/konradjk/loftee>) and dbNSFP (version 3.2)<sup>96</sup> plugins to  
1249 generate additional bioinformatic predictions of variant deleteriousness; from the  
1250 dbNSFP plugin, we took annotations from 15 different bioinformatic algorithms  
1251 (listed in **Supplementary Figure 8**) as well as the recent mCAP<sup>97</sup> algorithm. As  
1252 these annotations were not transcript-specific, we assigned them to all transcripts  
1253 for the purpose of downstream analysis.

1254

1255 All single-variant analyses reported in the manuscript or figures are shown using  
1256 the “best guess” annotation for each variant (as described above).

1257

#### 1258 Single-variant association analysis in sequence data

1259 To perform single-variant association analysis, we stratified samples by cohort of  
1260 origin and sequencing technology (i.e. samples from the same cohort but sequenced  
1261 at different times were analyzed separately). Samples from the ESP study were  
1262 treated differently, due to the large number of cohorts and sequencing technologies  
1263 within the study; we stratified ESP samples by ancestry (rather than cohort) and did  
1264 not further stratify them by sequencing technology. This procedure yielded 25  
1265 distinct sample subgroups (**Supplementary Figure 6**).

1266

1267 We then excluded variants separately for each subgroup, based on subgroup-  
1268 specific measures of call rate, Hardy-Weinberg equilibrium (HWE), differential case-  
1269 control missingness, and alternate allele genotype quality. Specific filters used to  
1270 exclude variants from all subgroups are shown in **Supplementary Figure 6**; in  
1271 general, filters were strict – particularly for multiallelic variants and X-chromosome  
1272 variants.

1273

1274 For some subgroups, we used stricter filters on top of the basic filters if subgroup-  
1275 specific quantile-quantile (QQ) plots showed an excess of significant associations. In  
1276 particular, the Ashkenazi subgroup from the T2D-GENES study showed minimum  
1277 heterogeneity in sequencing quality between cases and controls (owing to  
1278 resequencing performed subsequent to the original study publication) and required  
1279 significant filters to remove artifactual associations. In addition, due to a significant  
1280 imbalance between the number of cases and controls in the ESP studies, we  
1281 excluded any variants from that subgroup which had an association  $p$ -value less  
1282 than 0.3 times the  $p$ -value from Fisher's exact test (under the assumption that  
1283 covariates in the analysis were inducing statistical artifacts). The numbers of  
1284 variants passing these filters in each subgroup are shown in **Supplementary Figure**  
1285 **6**.

1286

1287 For each of the 25 sample subgroups, we conducted two single-variant association  
1288 analyses. In both single-variant analysis, we collapsed all non-reference alleles at  
1289 multiallelic sites into a single “non-reference” allele.

1290

1291 First, we analyzed all (including related) samples via the EMMAX test<sup>98</sup>, as  
1292 implemented in the EPACTS ([genome.sph.umich.edu/wiki/EPACTS](http://genome.sph.umich.edu/wiki/EPACTS)) software  
1293 package, using the GRM computed from the ancestry-specific ancestry variants. We  
1294 included in the model covariates for sequencing technology (where appropriate)  
1295 but not for PCs of genetic ancestry. We did not include covariates for age, sex, or  
1296 BMI.

1297

1298 Second, we analyzed unrelated samples via the Firth logistic regression test<sup>99</sup>, also  
1299 as implemented in EPACTS; we included in the model covariates for sequencing  
1300 technology and for PCs of genetic ancestry (computed from the ancestry-specific  
1301 ancestry variants). The number of PCs we included varied by subgroup; to select the  
1302 PCs to be included, we regressed T2D status on sequencing technology and the first  
1303 ten PCs and included in the model any PC that demonstrated nominal ( $p < 0.05$ )  
1304 association with T2D, as well as all higher-order PCs.

1305

1306 For each of the  $25 \times 2 = 50$  single-variant analyses, we inspected QQ plots of variant  
1307 association statistics and increased the stringency of the variant filters if the  
1308 distribution of association statistics appeared poorly calibrated. The filters shown in  
1309 **Supplementary Figure 6** represent the final values at which we arrived.

1310

1311 We then conducted a 25-group fixed-effect inverse-variance weighted meta-analysis  
1312 for each of the Firth and EMMAX tests, using METAL<sup>100</sup>. We used EMMAX results for

1313 association  $p$ -values and Firth results for effect size estimates. For comparison, we  
1314 conducted two additional meta-analyses with association Z-scores weighted by (a)  
1315 sample-size and (b) the number of variant carriers. We found that the sample-size  
1316 weighted meta-analysis had significantly reduced power to detect association for  
1317 variants with frequencies that varied widely by sample subgroup; for example,  
1318 1,425 East-Asian individuals carried p.Arg192His in *PAX4* ( $N=6,032$ ;  $p=1.2\times 10^{-21}$ )  
1319 compared to only 28 carriers across all other ancestries ( $N=39,199$ ;  $p>0.2$ ), yielding  
1320 an inverse-variance weighted meta-analysis  $p=7.6\times 10^{-22}$  and a sample-size weighted  
1321 meta-analysis  $p=1.0\times 10^{-6}$ . By contrast, the number-of-carrier weighted meta-  
1322 analysis yielded similar results as the inverse-variance weighted meta-analysis. We  
1323 elected to use the inverse-variance weighted method due to its widespread use<sup>100</sup>.  
1324 We did not conduct random-effects meta-analyses.

1325

### 1326 Replication of rs145181683

1327 To assess whether the rs145181683 variant in *SF11* ( $p=3.2\times 10^{-8}$  in the exome  
1328 sequence analysis) represented a true novel association, we obtained association  
1329 statistics from the 4,522 Latinos previously analyzed as part of an 8,214 sample  
1330 Latino GWAS published by the SIGMA-T2D consortium<sup>101</sup> who did not overlap with  
1331 the current study. Based on the odds ratio (1.19) estimated in our analysis and the  
1332 MAF (12.7%) in the replication sample, power was 91% to achieve  $p<0.05$  under a  
1333 one-sided association test. The observed evidence ( $p=0.90$ , OR=1.00) did not  
1334 support rs145181683 as a true T2D association.

1335

1336 Gene-level analysis

1337 We first filtered variants (or, more accurately, alleles, since in contrast to single-  
1338 variant analysis, we treated multiallelic variants as collections of independent  
1339 biallelic variants) according to seven different annotation “masks”, ranked in order  
1340 of increasing deleteriousness. The strongest mask consisted of alleles predicted to  
1341 cause loss of function by the LofTee algorithm  
1342 (<https://github.com/konradjk/loftee>), while weaker masks also included alleles  
1343 predicted deleterious by progressively fewer bioinformatic algorithms. Each mask  
1344 included all alleles in higher ranked masks as well as additional alleles specific to  
1345 the mask. In the two lowest ranked masks (the 1/5 1% and 0/5 1% masks, which  
1346 included alleles predicted deleterious by one or zero tools, respectively), we filtered  
1347 alleles specific to each mask according to allele frequency using a cutoff of MAF=1%,  
1348 with MAF computed as the maximum MAF across the five ancestries. A full list and  
1349 definitions of masks are shown in **Supplementary Figure 8**; the criteria listed in  
1350 the figure are for alleles specific to each mask.

1351

1352 To validate that the severity ordering of masks corresponded to an increasing  
1353 likelihood that an allele in the mask was deleterious, we used previously published  
1354 data assessing the extent to which all missense variants in the gene *PPARG* impeded  
1355 adipocyte differentiation (i.e. were annotated as causing *PPARG* loss of function).

1356 These data showed a trend whereby alleles in more severe masks had lower  
1357 predicted functionality (**Supplementary Figure 9**).

1358

1359 For each mask, we grouped alleles by gene according to VEP annotations of  
1360 impacted transcript; we assigned variants in transcripts of multiple genes to all such  
1361 genes. For each gene, we created up to three groupings of alleles, corresponding to  
1362 different transcript sets of the gene. First, the “best” grouping consisted of alleles in  
1363 the mask according to the “best guess” allele-level annotations. Second, the “all”  
1364 grouping consisted of alleles in the mask according to any transcript of the gene.  
1365 Third, the “filter” grouping consisted of alleles in the mask according to protein-  
1366 coding transcripts of the gene with TSL<3. For many genes, two or more of these  
1367 allele groupings were identical.

1368

1369 Additionally, we assigned mask-specific allele weights according to their aggregate  
1370 predicted deleteriousness. To calculate weights, we used a previously published  
1371 model<sup>12</sup> in which missense variants are a mixture of fully benign variants and fully  
1372 loss-of-function variants, with a parameter  $0 \leq x \leq 1$  determining the fraction of loss-  
1373 of-function variants. We assumed all alleles in the LofTee mask were full loss-of-  
1374 function variants ( $x=1$ ) and that all synonymous alleles were fully benign ( $x=0$ ). We  
1375 then calculated the (binned) frequency distribution, truncated at MAF<1%, of  
1376 biallelic LofTee and biallelic synonymous alleles, using these as reference  
1377 distributions of the frequency of loss-of-function and benign alleles, respectively.  
1378 For each mask, we then calculated the binned and truncated frequency distribution  
1379 for alleles specific to the mask (**Supplementary Figure 10**) and estimated a value  
1380 for  $x$  (by enumerating and testing a range of possible values between 0 and 1) that  
1381 maximized the likelihood of the observed frequency distribution. We then used the

1382 estimated values of  $x$  for allele weights, as shown in **Supplementary Figure 8**.  
1383 Because each mask consisted not only of alleles specific to the mask but also of  
1384 alleles present in higher ranked masks, alleles within any given mask had a range of  
1385 weights.  
1386  
1387 Prior to running gene-level tests, we performed additional quality control on sample  
1388 genotypes. For each of the 25 sample subgroups (the same subgroups used for  
1389 single-variant analysis), we identified all variants with low subgroup-specific call  
1390 rates, high subgroup-specific deviations from HWE, or high subgroup-specific  
1391 differences between case and control call rates (specific criteria are shown in  
1392 **Supplementary Figure 8**). For each variant failing any of these criteria, all  
1393 genotypes for individuals in the subgroup (regardless of allele) were set as  
1394 “missing”; for multiallelic variants, all subgroup genotypes were set as missing if any  
1395 allele failed any quality control criterion.  
1396  
1397 We then conducted a series of tests across the masks. We used a burden test and  
1398 SKAT<sup>38</sup>, both as implemented in the EPACTS software package. The burden test  
1399 assumes that the effect sizes of all analyzed variants are the same, while the SKAT  
1400 test allows effect sizes to vary<sup>102</sup>. We conducted each test across all unrelated  
1401 individuals pooled together (i.e. in contrast to single-variant analysis, we performed  
1402 a “mega-analysis” rather than a meta-analysis) and included ten PC covariates  
1403 (computed from the transethnic ancestry SNPs) as well as indicator covariates for  
1404 the 25 sample subgroups (the same as defined in single-variant analysis). We did



1405 not include covariates for age, sex, or BMI in our analysis, as they had little effect on  
1406 our results.

1407

1408 We implemented subgroup-specific genotype filters (as defined in the previous  
1409 quality control step) by modifying the EPACTS software to set specified genotypes  
1410 to missing during association testing; we achieved allele-specific tests for  
1411 multiallelic variants (i.e. in which only one allele was present in the mask) in a  
1412 similar manner by setting non-reference genotypes to missing for samples that  
1413 carried an allele outside of the mask. We also modified the EPACTS software to  
1414 accept allele-specific weights by multiplying genotypes (or more accurately,  
1415 genotype dosages) by the relevant weight prior to conducting the formal burden or  
1416 SKAT analysis.

1417

#### 1418 Consolidation of tests across masks

1419 Historically, exome sequencing studies have produced separate gene-level  
1420 association results for each allelic mask. While straightforward to report,  
1421 interpreting multiple  $p$ -values for each gene can be challenging – particularly if the  
1422 goal is to determine whether a specific gene demonstrates association with a  
1423 phenotype. To address this challenge, we developed two methods to collapse  
1424 association results across different allelic masks.

1425

1426 The first method (“weighted test”) collapses associations under a model whereby  
1427 the phenotypic effects of alleles are directly proportional to their bioinformatically

1428 estimated deleteriousness. In the “weighted burden” test, we used the sum of the  
1429 weights of alleles carried by an individual as a predictor variable in place of the total  
1430 number of alleles carried. In the “weighted SKAT” test, we multiplied the default  
1431 weights used in the SKAT EPACTS implementation by the allelic weights we  
1432 calculated. For these weighted tests we included all alleles in the 0/5 1% mask in  
1433 the analysis.

1434

1435 Because bioinformatically predicted severity is an imperfect proxy to actual  
1436 phenotypic severity, we developed a second method, the “minimum  $p$ -value test”, to  
1437 collapse associations across masks. We chose the minimum  $p$ -value test to provide a  
1438 principled extension of an *ad hoc* but intuitive way to interpret multiple  $p$ -values for  
1439 a given gene: take the smallest  $p$ -value observed across each mask and then correct  
1440 for the effective number of tests performed for the gene.

1441

1442 To conduct these minimum  $p$ -value tests, we first ran the burden and SKAT analyses  
1443 for each of the seven masks separately, following usual exome sequence analysis  
1444 protocols by using no weights and including all alleles in each mask. For each gene,  
1445 we then converted the seven  $p$ -values into a single  $p$ -value via the formula

$$1 - (1 - p_{min})^e$$

1446 where  $e$  is the effective number of independent tests performed across the masks.

1447 To estimate  $e$ , we applied a previous approach<sup>39</sup> originally developed to compute  
1448 the effective number of independent  $p$ -values across a set of SNPs:

$$M - \sum_{i=1}^M [I(\lambda_i > 1)(\lambda_i - 1)]$$

1449 where in our case  $M$  equals the number of masks (usually seven, except for genes  
1450 that lack variants in one or more masks or for which two masks are identical) and  $\lambda_i$   
1451 are the eigenvalues of the  $M \times M$  matrix of correlations among the  $p$ -values of the  
1452 mask-level tests. To compute the mask  $p$ -value correlation matrix, we followed the  
1453 previous approach by first calculating the mask genotype correlation matrix (i.e., for  
1454 each mask, producing a vector with the number of variants in the mask carried by  
1455 each individual, and then calculating correlations of the vectors) and then  
1456 transforming the genotype correlation matrix according to the previously  
1457 empirically derived<sup>39</sup> polynomial equation:

$$y = 0.2982x^6 - 0.0127x^5 + 0.0588x^4 + 0.0099x^3 + 0.6281x^2 - 0.0009x$$

1458 where  $x$  is the measured correlation between the number of alleles carried and  $y$  is  
1459 the estimated correlation between  $p$ -values.

1460

1461 We note that this polynomial equation was initially developed to translate  
1462 correlations between individual variants and  $p$ -values, rather than correlations  
1463 between aggregate sets of variants and  $p$ -values, and thus may not be as accurate in  
1464 our setting. However, genomic control estimates ( $\lambda=0.67$ ) and QQ plots  
1465 (**Supplementary Figure 11**) suggested that if anything our multiple test correction  
1466 was conservative for most genes. Furthermore, even if our gene-level  $p$ -values were  
1467 Bonferroni corrected for all seven masks, the results of our study would remain  
1468 largely unchanged: each of *SLC30A8*, *MC4R*, and *PAM* would still exceed exome-wide

1469 significance (for both the weighted and minimum  $p$ -value tests), and the gene set  
1470 tests would remain nearly identical (as they are based on gene-level  $p$ -value ranks  
1471 rather than absolute values). Future work could investigate the application of other  
1472 methods previously developed to correct for correlated  $p$ -values<sup>103,104</sup>.

1473

1474 The application of two different methods for collapsing  $p$ -values across masks for  
1475 each of two tests yielded four analyses for each gene, corresponding to a weighted  
1476 burden analysis, a weighted SKAT analysis, an minimum  $p$ -value burden analysis,  
1477 and an minimum  $p$ -value SKAT analysis. In fact, for each of the four analyses,  
1478 multiple  $p$ -values were possible for each gene (corresponding to the different  
1479 transcript sets used for annotation). To produce a single gene-level  $p$ -value for each  
1480 of the four analyses, we thus collapsed (for each gene) the set of  $p$ -values across  
1481 transcript sets into a single gene-level  $p$ -value using the same procedure as for the  
1482 minimum  $p$ -value test (i.e. taking the minimum  $p$ -value corrected for the effective  
1483 number of tests performed).

1484

1485 For some genes (**Supplementary Figures 12-14**) we conducted additional gene-  
1486 level analyses to dissect the aggregate signals observed. First, we performed tests  
1487 for each mask separately, including only variants specific to the mask (rather than  
1488 all variants), to understand whether the aggregate signal was observed in only one  
1489 as opposed to multiple masks. Second, we performed tests by progressively  
1490 removing variants in order of lowest single-variant analysis  $p$ -value, to understand  
1491 the (minimum) number of variants that contributed statistically to the aggregate

1492 signal. Third, we performed tests conditional on each variant separately (i.e.  
1493 calculating separate models with each individual variant as a covariate), with the  
1494 resulting *p*-values compared to the full gene-level *p*-value, to assess the contribution  
1495 of each variant individually to the signal.

1496

#### 1497 Analysis of exomes from the Geisinger Health System (GHS)

1498 We obtained gene-level association results previously computed from an analysis of  
1499 49,199 individuals (12,973 T2D cases and 36,226 controls) from the Geisinger  
1500 Health System. We requested association summary statistics for the 50 genes with  
1501 the strongest gene-level associations from our analysis; 44 genes had precomputed  
1502 summary statistics available; pseudogene *UBE2NL* and X chromosome genes  
1503 *MAP3K15*, *SLC16A2*, *MAGEB5*, *DGKK*, and *MAGEE2* were not available.

1504

1505 GHS sequence data were processed and analyzed as previously described<sup>27</sup> and  
1506 association results were produced for four (nested) variant masks:

- 1507 1. M1: predicted loss-of-function variants, according to the VEP, with MAF<1% –  
1508 similar to the LofTee mask but with an additional MAF<1% filter and without the  
1509 LofTee filter on protein-truncating variants annotated by the VEP.
- 1510 2. M2: nonsynonymous variants predicted deleterious by 5/5 prediction  
1511 algorithms with MAF<1% – similar to the 5/5 mask but with an additional filter  
1512 on MAF<1%.
- 1513 3. M3: all nonsynonymous variants predicted deleterious by  $\geq 1/5$  bioinformatic  
1514 algorithms with MAF<1% – similar to the 1/5 1% mask.

1515 4. M4: all nonsynonymous variants with MAF<1% – similar to the 0/5 1% mask,  
1516 although not identical as the 1% filter was used for all variants including those in  
1517 the LofTee and 5/5 masks.

1518

1519 For each mask, association results were computed via logistic regression under an  
1520 additive burden model (with phenotype regressed on the number of variants  
1521 carried by each individual) with age, age<sup>2</sup>, and sex as covariates. Although this  
1522 analysis procedure was broadly consistent with the one we used for our exome  
1523 sequence analysis, we were not able to synchronize our procedures for quality  
1524 control, annotation, and collapsing association statistics across masks.

1525

1526 To produce a single GHS *p*-value for each gene, we applied the minimum *p*-value  
1527 procedure across the four mask-level results. We estimated the correlation matrix  
1528 using the same procedure as for our exome sequence analysis, using the combined  
1529 GHS allele frequencies reported across the four (nested) masks.

1530

#### 1531 Analysis of exomes from the CHARGE consortium

1532 We collaborated with the CHARGE consortium to analyze the 50 genes with the  
1533 strongest gene-level associations from our analysis in 12,467 individuals (3,062  
1534 T2D cases and 9,405 controls) from their previously described study<sup>105</sup>. CHARGE  
1535 DNA samples were processed at Baylor College of Medicine Human Genome  
1536 Sequencing Center using the VCRome 2.1 design and sequenced in paired-end mode  
1537 in a single lane on the Illumina HiSeq 2000 or the HiSeq 2500 platform with a mean

1538 78-fold coverage. All samples were called together and details on sequencing,  
1539 variant calling, and variant quality control were described in detail by Yu et al.<sup>106</sup>  
1540  
1541 Variants in the CHARGE exomes were annotated and grouped into seven masks  
1542 using the same procedure as for the original exome sequence analysis. For each  
1543 mask, CHARGE burden and SKAT association tests were performed in the Analysis  
1544 Commons<sup>107</sup> using a logistic mixed model<sup>108</sup> assuming an additive genetic model  
1545 and adjusted for age, sex, study, race, and kinship.  
1546  
1547 To produce a single CHARGE  $p$ -value for each gene, we applied the minimum  $p$ -value  
1548 procedure across the four mask-level results, as for the GHS analysis.  
1549  
1550 Evaluation of directional consistency between exome sequence, CHARGE, and GHS  
1551 analyses  
1552 We examined the concordance of direction of effect size estimates (i.e.  $OR > 1$  or  
1553  $OR < 1$ ) between our original exome sequence analysis and those from CHARGE and  
1554 GHS. We used burden test statistics for this analysis, as SKAT tests do not produce  
1555 direction of effects. Of the 50 genes advanced for replication, we considered the 46  
1556 that reached burden  $p < 0.05$  for at least one mask (i.e. ignoring those with evidence  
1557 for association only under the SKAT model). We compared the direction of effect to  
1558 that estimated by burden analysis of the same (or analogous) mask in the GHS or  
1559 CHARGE analysis. For CHARGE, we compared direction of effect for the same mask.  
1560 For GHS, we compared use the following approximate mapping between masks:

1561 LofTee to M1; 15/15, 10/10, 5/5, and 5/5+LofTee LC to M2; 1/5 1% to M3; and 0/5  
1562 1% to M4. We then conducted a one-sided exact binomial test to assess whether the  
1563 fraction of results with consistent direction of effects was significantly greater than  
1564 expected by chance.

1565

#### 1566 Generation of candidate T2D-relevant genes sets

1567 To assess whether gene-level association strength could be an informative metric to  
1568 use when prioritizing candidate genes for further study or experimentation, we  
1569 compared gene-level associations for genes in a variety of gene sets

1570 **(Supplementary Table 10)** to gene-level association statistics for random sets of  
1571 genes matched with the target set based on the number and frequencies of variants  
1572 (as described below). We did so for 16 sets of genes:

- 1573 1. *Eleven genes harboring mutations that cause Maturity Onset Diabetes of the Young*  
1574 *(MODY)*. We selected genes from a set previously described<sup>24</sup> after excluding two  
1575 genes (*ABCC8* and *KCNJ11*) that can cause monogenic diabetes or congenital  
1576 hyperinsulinism depending on whether the mutations they harbor are activating  
1577 or inactivating.
- 1578 2. *Eight genes annotated as targets for antidiabetic medications*. We downloaded  
1579 medications annotated as “Drugs Used in Diabetes” or “Blood Glucose Lowering”  
1580 from the DrugBank database version 5.0<sup>48</sup>. After exclusion of medications with  
1581 more than two annotated targets, we advanced for analysis only genes (a)  
1582 annotated as a target of at least two compounds and (b) for which the  
1583 therapeutic target modulation strategy was consistently annotated across all



1584 medications, where annotations of “inhibitor”, “antagonist”, and “inverse  
1585 agonist” were interpreted as reducing activity, while annotations of “agonist”,  
1586 “activator”, or “inducer” were interpreted as increasing activity. These  
1587 restrictions excluded *ABCC8* from analysis, as it was annotated as the target of  
1588 both an inhibitor and an agonist; we elected to maintain this exclusion, despite  
1589 multiple lines of evidence<sup>109</sup> indicating inhibition of *ABCC8* to be the appropriate  
1590 anti-diabetic strategy, to maintain consistent criteria across all genes selected for  
1591 analysis. Additionally, we excluded *KCNJ11* (which with *ABCC8* encodes the ATP-  
1592 sensitive K(ATP) channel targeted by sulfonylureas) from analysis because both  
1593 medications listed in DrugBank as targeting it had more than two targets  
1594 (Glyburide, 8, and Glimepiride, 3). The resulting gene set was thus *GLP1R*, *IGF1R*,  
1595 *PPARG*, *INSR*, *SLC5A2*, *DPP4*, *KCNJ1*, and *KCNJ8*.

1596 *3-14. Twelve sets of genes reported as relevant to T2D in mouse models.* Within the  
1597 Mouse Genome Informatics Database, we searched for genes matching various  
1598 diabetes-relevant “phenotypes, alleles, and disease models” under the broader  
1599 category of “mouse phenotypes and mouse models of human disease”. We  
1600 constructed a gene set for each phenotype defined in the database, many of  
1601 which overlapped. For phenotypes associated with increased diabetes risk, we  
1602 used: (3) “type 2 diabetes or type ii diabetes” (i.e. non-insulin dependent  
1603 diabetes; 31 genes), (4) “diabetes mellitus” (72 genes), (5) “impaired glucose  
1604 tolerance” (327 genes), (6) “increased circulating glucose” (365 genes), (7)  
1605 “insulin resistance” (181 genes), and (8) “decreased insulin secretion” (133  
1606 genes). For phenotypes associated with decreased diabetes risk, we used: (9)

1607 “improved glucose tolerance” (239 genes), (10) “decreased circulating glucose”  
1608 (481 genes), (11) “increased insulin sensitivity” (178 genes), and (12) “increased  
1609 insulin secretion” (51 genes). For phenotypes associated with diabetes risk but  
1610 with unclear direction of effect, we used (13) “decreased circulating insulin”  
1611 (321 genes) and (14) “increased circulating insulin” (215 genes).

1612 *15. Eleven genes suspected of harboring common coding causal variants within T2D*  
1613 *GWAS loci.* We analyzed the set of genes from a recent exome array analysis<sup>17</sup>  
1614 which contained a coding variant GWAS signal for which the unweighted  
1615 posterior probability of causality exceeded 25%. Although the final values  
1616 reported by the study include an elevated prior for coding variants, we elected to  
1617 use a 25% unweighted posterior threshold to enrich for the genes with the  
1618 highest likelihood of mediating the observed GWAS signal. For analysis of this  
1619 gene set, we recomputed gene-level association statistics within the set by  
1620 conditioning on all GWAS tag SNPs (within the locus) reported in the exome  
1621 array analysis<sup>17</sup>; we used *p*-values from these conditional gene-level associations  
1622 in the gene set analysis.

1623 *16. Twenty genes with T2D-associated transcript levels.* We selected genes with  
1624 significant associations in a pre-publication<sup>52</sup> tissue-wide T2D association  
1625 analysis (i.e. testing for association between the genetic component of tissue-  
1626 level gene expression and T2D), with associations considered significant if they  
1627 survived Bonferroni correction for all tested genes and all tested tissues. Results  
1628 were computed with the MetaXcan software package<sup>110</sup> using SNP regression  
1629 coefficients taken from a large trans-ethnic T2D GWAS meta-analysis<sup>111</sup> and

1630 gene expression prediction models from the PredictDB website

1631 (<http://predictdb.org>).

1632

### 1633 Gene set analysis

1634 For each gene set, our goal was to compare the gene level  $p$ -values within the set to

1635 those of genes chosen at random from the genome. To control for gene variability in

1636 the number and frequency of variants within them, which could confound

1637 comparisons, we constructed comparison genes by matching on four properties: the

1638 (1) number of variants in any of the seven variant masks; (2) total allele counts over

1639 all variants in any of the seven masks; (3) number of tests across all variant masks

1640 and transcript sets; and (4) effective number of tests across all variant masks and

1641 transcript sets (as computed for the minimum  $p$ -value test). We scaled each

1642 property to zero mean and unit variance. For each gene, we then used the 50

1643 nearest neighbors (defined using Euclidean distance in the scaled property space)

1644 as matched comparison genes.

1645

1646 To conduct a gene set analysis, we then combined the genes in the gene set with all

1647 of the comparison genes matched to each gene in the set. Within the combined list of

1648 genes, we ranked genes using the  $p$ -values observed for the minimum  $p$ -value

1649 burden test. We then used a one-side Wilcoxon rank-sum test to assess whether

1650 genes in the gene set had significantly higher ranks than the comparison genes.

1651

1652 For gene set analysis, we used the minimum  $p$ -value test, rather than the weighted  
1653 test, under the rationale that (a) we aimed to detect associations with as many genes  
1654 as possible using information from as many variants as possible and (b) the  
1655 weighted test might not detect genes that did not follow its model of a strong  
1656 correlation between variant effect sizes and molecular annotation. We used the  
1657 burden test rather than SKAT based on a desire to have more interpretable  
1658 association statistics (e.g. effect size estimates). However, we did not quantitatively  
1659 and systematically compare the power of each of our analyses in this setting.

1660

#### 1661 Use of gene-level associations to predict effector genes

1662 In most situations, GWAS associations implicate common regulatory variants, which  
1663 seldom localize to specific genes. To assess whether gene-level associations from  
1664 exome sequencing – which are composed mostly of rare variants independent from  
1665 any GWAS associations – could prioritize potential effector genes within known T2D  
1666 GWAS loci, we catalogued all genes within each locus reaching  $p < 0.05$  for the  
1667 minimum  $p$ -value burden test. We took a list of 94 GWAS loci from a recent review  
1668 article<sup>53</sup> and advanced for analysis the 595 genes within 250kb of an index SNP.

1669

1670 We then sought to compare two methods to predict effector genes within these loci.  
1671 First, we used  $p < 0.05$  according to the minimum  $p$ -value gene-level test from our  
1672 exome sequence analysis to predict candidate effector genes, producing a list of 40  
1673 genes (across 32 loci). Second, we used proximity to the index SNP (as predicted by

1674 DAPPLE<sup>54</sup>) to predict candidate effector genes, producing a list of 184 genes (at  
1675 some loci DAPPLE annotated more than one candidate effector gene).  
1676  
1677 As accurately assessing which of these two gene sets is more enriched for true  
1678 effector genes would require (at minimum) significant experimental work, we used  
1679 the relative number of protein interactions within each gene set as one (imperfect)  
1680 measure of their respective biological “coherence”. To assess whether each set  
1681 encodes proteins with more interactions than would be expected by chance, we ran  
1682 DAPPLE through the public GenePattern portal  
1683 (<https://software.broadinstitute.org/cancer/software/genepattern>) with default  
1684 values for all parameters. The 40 genes with minimum  $p < 0.05$  were significantly  
1685 more enriched for protein interactions ( $p = 0.03$ ; observed mean = 11.4, expected  
1686 mean = 4.5) than were the 184 genes implicated based on proximity to the index SNP  
1687 ( $p = 0.64$ ; observed mean = 21.1, expected mean = 21.9).  
1688  
1689 While these results suggest that gene-level associations may be useful for  
1690 prioritizing effector genes, we note that they do not implicate any specific genes and  
1691 that DAPPLE is only one means to assess biological coherence of a gene set (through  
1692 direct and indirect protein interactions). Evaluation of the biological candidacy of  
1693 these genes may ultimately require in-depth functional studies<sup>56</sup>.  
1694  
1695 Use of gene-level associations to predict direction of effect

1696 In therapeutic development, it is often valuable to know the direction of effect  
1697 linking gene modulation to disease risk – that is, whether inactivation or activation  
1698 of a protein increases disease risk. We thus assessed whether gene-level association  
1699 analysis of predicted deleterious variants could be used to predict this direction of  
1700 effect. For this analysis, we used odds ratios estimated from a modified weighted  
1701 burden test procedure, which only included alleles from the four masks with the  
1702 predicted most deleterious variants: LofTee, 16/16, 11/11, and 5/5  
1703 (**Supplementary Figure 8**). Weights for variants were identical to those used in the  
1704 exome-wide weighted burden test. We chose these four masks for analysis to  
1705 balance a desire for greater aggregate allele count per gene (i.e. missense variants in  
1706 addition to protein-truncating variants) with a need to strongly enrich for  
1707 deleterious variants (>73% estimated to be deleterious in masks analyzed vs. <50%  
1708 in the other masks (**Supplementary Figure 8**). In addition, we used the weighted  
1709 test because it was explicitly designed to estimate an effect of gene  
1710 haploinsufficiency based on both protein-truncating and missense variants.  
1711  
1712 To compare these direction of effect estimates to those expected for T2D drug  
1713 targets, we assumed agonist targets to have true  $OR > 1$  and inhibitors to have true  
1714  $OR < 1$ . For a comparison to expectations for mouse gene knockouts, we first  
1715 excluded 473 genes annotated, based on membership in multiple gene sets, to have  
1716 both expected  $OR > 1$  and expected  $OR < 1$  (these genes were excluded only from the  
1717 direction of effect comparisons; they were maintained in all other gene set  
1718 analyses). This left 389 genes with an expected  $OR > 1$ , associated exclusively with

1719 mouse traits indicative of increased risk (overlapping sets of 11 “type 2 diabetes or  
1720 type ii diabetes”, 46 “diabetes mellitus”, 204 “impaired glucose tolerance”, 245  
1721 “increased circulating glucose”, 104 “insulin resistance”, and 63 “decreased insulin  
1722 secretion”), and 467 genes with an expected  $OR < 1$ , associated exclusively with traits  
1723 indicative of decreased risk (overlapping sets of 164 “improved glucose tolerance”  
1724 genes, 358 “decreased circulating glucose” genes, 95 “increased insulin sensitivity”  
1725 genes, and 18 “increased insulin secretion” genes). Gene sets for “decreased  
1726 circulating insulin” and “increased circulating insulin” were excluded from this  
1727 direction of effect comparison due to the unclear relationship between these  
1728 phenotypes and T2D risk.

1729

#### 1730 Aggregation and generation of SNP array data

1731 Because the most significant single-variant associations that emerged from our  
1732 exome sequence analysis were with common variants, we asked whether an array-  
1733 based genome-wide association study in the same samples could have provided a  
1734 less expensive method to detect these same associations. To address this question,  
1735 we aggregated all available SNP array data for the exome-sequenced samples  
1736 (**Supplementary Table 12**). Data for the GoT2D<sup>24</sup>, SIGMA<sup>85</sup>, and T2D-GENES  
1737 consortia have been previously analyzed (unpublished T2D-GENES data were  
1738 collected from a range of SNP arrays including Affymetrix 5.0 and 6.0, Illumina  
1739 HumanHap 610K and 1M, and the Illumina CardioMetaboChip). The newly  
1740 sequenced samples from the T2D-GENES and SIGMA consortia were genotyped on a  
1741 custom “Genomes For Life” (G4L) Illumina Infinium array, including 243,662

1742 variants chosen to uniquely identify each individual in a study and to provide a  
1743 backbone for imputation of common variation. The G4L array was processed by the  
1744 Arrays lab of Broad Genomics and called using the Illumina GenCall (Autocall)  
1745 algorithm.  
1746  
1747 Analysis of SNP array data  
1748 After genotyping, the 34,529 samples (18,233 cases and 17,679 controls;  
1749 **Supplementary Table 12**) both in the exome sequence analysis and with a SNP  
1750 array call-rate >95% were advanced for imputation. To omit variants that might  
1751 degrade imputation quality, prior to imputation we excluded variants with low  
1752 genotype call rate (<95%), strong deviation from Hardy-Weinberg equilibrium  
1753 ( $p < 10^{-6}$ ), differential genotype call rate between cases and controls ( $p < 10^{-5}$ ), or low  
1754 frequency (MAF < 1%). We then imputed autosomal variants (SNVs, short indels, and  
1755 large deletions) via the Michigan Imputation Server<sup>112</sup> for each of two reference  
1756 panels: the all ancestries 1000 Genomes Phase 3 (1000G) reference panel of 2,504  
1757 individuals<sup>67</sup> and the Haplotype Reference Consortium (HRC) Panel of 32,470  
1758 individuals<sup>68</sup>. We used the 1000G-based imputation for all association analyses and  
1759 the HRC-based imputation to assess the number of exome sequence variants  
1760 imputable from the largest available European reference panel. We note that the  
1761 HRC panel includes only SNPs (i.e. no indels) and only variants observed at least five  
1762 times in the sequence data contributed to the HRC.  
1763



1764 After imputation, we performed sample and variant quality control, as well as  
1765 association tests, analogous to the exome sequence single-variant analysis. By  
1766 contrast with the exome sequence analysis, we found that the EMMAX test produced  
1767 more suspicious looking associations than did the Firth test and thus used only the  
1768 Firth test (i.e. for both  $p$ -values and ORs) in the imputed GWAS analysis.

1769

1770 To determine which variants in the exomes dataset were imputable from the 1000G  
1771 or HRC panel, we calculated which of the exome variants passed imputed GWAS  
1772 quality control in any sample subgroup, with a further restriction of achieving  $r^2 > 0.4$   
1773 in that subgroup. Only variants in the exomes dataset that were polymorphic in the  
1774 imputed GWAS samples were included in this analysis. For calculations involving  
1775 the HRC-imputed GWAS (given that the HRC panel is European-specific), we only  
1776 considered variants variable in four European cohorts (METSIM, Ashkenazi,  
1777 GoDARTS, and FHS) in the analysis.

1778

#### 1779 Gene set analysis using SNP array data

1780 In addition to single-variant analysis, we conducted gene set analysis with the  
1781 imputed GWAS data. We first used the method implemented in MAGENTA<sup>70</sup> to  
1782 assign gene scores from the imputed GWAS single-variant association results;  
1783 MAGENTA gene scores are based on proximity to a GWAS lead SNP after correction  
1784 for potential confounding factors. In the same way as for gene set analysis from the  
1785 exome sequence gene-level results, we then conducted a one-sided Wilcoxon rank-  
1786 sum test to compare the gene scores to those of matched comparison genes.

1787

1788 As the imputed GWAS gene set analysis produced fewer significant gene set  
1789 associations than did the exome sequence gene set analysis, we investigated  
1790 whether a larger array-based association study would produce more significant  
1791 gene set associations (i.e. whether the lack of gene set associations in the imputed  
1792 GWAS was due to a fundamental lack of associated common variants near the genes  
1793 in the gene set or simply due to an insufficient sample size). For this analysis, we  
1794 downloaded single-variant association statistics from the largest available multi-  
1795 ethnic array-based GWAS for T2D<sup>111</sup>, converted them to MAGENTA gene scores, and  
1796 then for each gene set conducted a Wilcoxon rank-sum test as described above.

1797

#### 1798 LVE calculations

1799 To calculate liability variance explained (LVE), we used a previously presented  
1800 formula<sup>69</sup> to calculate the LVE of a variant with three genotypes (*AA*, *Aa*, and *aa*) and  
1801 corresponding relative risks ( $1$ ,  $RR_1$ , and  $RR_2$ ). For these calculations we assumed  
1802 HWE, implying the frequencies of the three genotypes to be  $P_{aa}=P_a^2$ ,  $P_{Aa}=2P_a(1-P_a)$ ,  
1803 and  $P_{AA}=(1-P_a)^2$ , where  $P_a$  is the minor allele frequency. Under this assumption, LVE  
1804 can be expressed as

$$LVE = P_a^2(\mu_{aa} - \mu)^2 + 2P_a(1 - P_a)(\mu_{Aa} - \mu)^2 + (1 - P_a)^2(\mu_{AA} - \mu)^2$$

1805 where  $\mu = 2P_a(1 - P_a)\mu_{Aa} + (1 - P_a)^2\mu_{AA}$ , and

$$\mu_{aa} = 0; \mu_{Aa} = T - \Phi^{-1}(1 - f_{Aa}); \mu_{AA} = T - \Phi^{-1}(1 - f_{AA})$$

1806 Here  $\Phi^{-1}$  is the normal quantile distribution,  $T = \Phi^{-1}(1 - f_{aa})$ , and  $f_{aa}$ ,  $f_{Aa}$ , and  $f_{AA}$

1807 are defined as

$$f_{aa} = \frac{K}{P_a^2 + 2P_a(1 - P_a)RR_1 + (1 - P_a)^2RR_2}; f_{Aa} = RR_1f_{aa}; f_{AA} = RR_2f_{aa}$$

1808 where  $K$  is the disease prevalence.

1809

1810 The inputs to these formulae are estimates of allele frequency (for either individual  
1811 variants or sets of variants, depending on whether variant-level or gene-level  
1812 variance is to be calculated), relative risk, and disease prevalence. For individual  
1813 variants, we used the point estimate of the MAF from our analysis to estimate allele  
1814 frequency, while for genes we used the point estimate of combined allele frequency  
1815 (across all alleles) in place of MAF. We estimated relative risks from analysis ORs  
1816 and MAFs ( $\hat{P}_a$ ) under an assumed prevalence of  $K=0.08$  and an additive genetic  
1817 model, by iteratively solving two equations<sup>69</sup>:

$$f_{aa} = \frac{K}{\hat{P}_a^2 + 2\hat{P}_a(1 - \hat{P}_a)RR_1 + (1 - \hat{P}_a)^2RR_2}$$

1818

$$RR_i = \frac{OR_i}{1 + f_{aa}(OR_i - 1)}$$

1819 where  $i=1,2$  correspond to the heterozygous and major-allele homozygous  
1820 genotypes. We used a multiplicative model for odds-ratios; i.e.  $OR_2 = OR_1^2$ .

1821

1822 We performed LVE calculations as an integral over the distribution of potential  
1823 relative risks, assuming that the logarithm of odds ratios  $OR_i$  followed normal  
1824 distributions with means and variance equal to those estimated from our analysis.  
1825 When presenting the strongest LVE values for the imputed GWAS analysis, we only

1826 considered variants genotyped in at least 10,000 individuals to avoid potential  
1827 artifacts resulting from a spurious association in a small sample subgroup.  
1828  
1829 For gene-level LVE calculations, we used the variant mask with lowest  $p$ -value to  
1830 calculate LVE. As each mask may have included a mixture of disease-associated and  
1831 benign alleles, the calculated LVE may underestimate the true LVE for disease-  
1832 associated alleles within the gene. To calculate an upper bound on the LVE by only  
1833 disease-associated alleles, we performed a series of LVE calculations for  
1834 progressively larger sets of alleles, at each step including alleles by order of  
1835 decreasing single-variant significance. We performed two calculations for each gene,  
1836 one for risk alleles and one for protective alleles, taking the maximum of the two as  
1837 the final upper bound estimated for LVE by the gene. We did not calculate an LVE  
1838 bound under a model whereby alleles within the gene can both increase and  
1839 decrease risk of disease.

1840

#### 1841 Estimated power to detect gene-level associations with T2D drug targets

1842 To estimate the power of future studies to detect gene-level associations in genes  
1843 with effect sizes similar to those for established T2D drug targets, we used  
1844 aggregate allele frequencies and odds ratios estimated from our gene-level analysis  
1845 and an assumed prevalence of  $K=0.08$  to calculate a proxy for true population  
1846 frequencies and relative risks. In each case, we used odds ratios and frequencies  
1847 from the variant mask yielding the strongest gene-level association. Because on  
1848 average these drug targets had 5 effective tests per mask, we used an exome-wide

1849 significance threshold of  $\alpha=1.25\times 10^{-7}$  for power calculations. We calculated power  
1850 as previously described<sup>92</sup>.

1851

### 1852 Estimated fraction of true associations

1853 We sought to quantify the proportion of true associations (PPA) for nonsynonymous  
1854 variants observed in our dataset as a function of association strength as measured  
1855 by single-variant *p*-value. We define a true association as a variant which, when  
1856 studied in larger sample sizes, will eventually achieve statistical significance owing  
1857 to a true OR $\neq$ 1. We distinguish *true* association from *causal* association: causally  
1858 associated variants are the subset of truly associated variants in which the variant  
1859 itself is causal for the increase in disease risk, as opposed to being truly associated  
1860 due to LD with a different causally associated variant.

1861

1862 To estimate PPA, we used as training data a previous exome array study from the  
1863 GoT2D consortium spanning 13 European cohorts<sup>24</sup>. As two of the 13 cohorts  
1864 included in the previous study contributed samples to the current exome sequence  
1865 analysis, we re-calculated a fixed-effects inverse-variance weighted meta-analysis  
1866 for every variant in the exome array study after excluding all samples from these  
1867 two overlapping cohorts. This yielded a collection of exome array association  
1868 statistics for 206,373 variants, with a maximum sample size of 50,567 (maximum  
1869 effective sample size 41,967).

1870

1871 We then compared variant direction of effect estimated from our exome sequence  
1872 analysis of 45,231 individuals to those estimated from the independent exome array  
1873 analysis of 41,967 individuals. To produce an uncorrelated set of associations tests  
1874 for this analysis, we pruned all collections of variants using the LD-clump procedure  
1875 (parameters `-clump-p1 0.1 -clump-p2 0.1 -clump-r2 0.01`) of the PLINK software  
1876 package<sup>90</sup>, which required variants to have pairwise  $r^2 < 0.01$ . We performed this  
1877 procedure for (a) nonsynonymous variants within 94 previously established T2D  
1878 GWAS loci and (b) nonsynonymous variants exome-wide. For the 1,059  
1879 nonsynonymous variants within established T2D GWAS loci achieving  $p < 0.05$  in the  
1880 exome sequence analysis, the directions of effect were concordant (both  $OR > 1$  or  
1881 both  $OR < 1$ ) with the exome array analysis for 61.3% of variants. This fraction  
1882 decreased (as expected) for higher  $p$ -value thresholds (e.g. 49.4% at  $p > 0.5$ ) and  
1883 when only variants outside of T2D GWAS loci were analyzed (51.9% at  $p < 0.05$ ).  
1884  
1885 To estimate the fraction of true associations among the set of variants achieving  
1886 significance below a threshold  $p$  (e.g.  $p < 0.05$ ), we modeled the set of variants as a  
1887 mixture of proportions  $x_p$  of truly associated variants ( $OR \neq 1$ ) and  $(1 - x_p)$  of truly non-  
1888 associated variants ( $OR = 1$ ). We assumed non-associated variants have a 50%  
1889 chance of a concordant direction of effect between the two analyses, and truly  
1890 associated variants have a greater chance according to their estimated effect size.  
1891 Specifically, assuming that the observed effect size for a variant follows a normal  
1892 distribution with mean equal to the true effect and variance that scales inversely

1893 with sample size, we estimated the probability  $p_i$  of producing a concordant effect  
1894 for variant  $v_i$  as

$$p_i = \Pr \left( N \left( |\hat{\beta}|, \hat{\sigma} \sqrt{\frac{N_{ex}}{N_{ea}}} \right) > 0 \right)$$

1895 where  $|\hat{\beta}|$  is the absolute value of the estimated (from the exome sequence analysis)  
1896 logarithm of the odds ratio,  $\hat{\sigma}$  is the estimated standard error of the logarithm of the  
1897 odds ratio,  $N_{ex}$  is the effective sample size of the exome sequence analysis, and  $N_{ea}$  is  
1898 the effective sample size of the exome array analysis.

1899

1900 The expected fraction of variants exhibiting concordant direction of effect is then

$$f_p = \frac{\sum_{i=1}^{V_p} p_i x_p}{V_p} + 0.5 (1 - x_p)$$

1901 where  $V_p$  is the number of variants in the set. Based on the observed fraction  $\hat{f}_p$  of  
1902 variants with concordant directions of effect, we thus estimated  $x_p$  by

$$\hat{x}_p = \frac{\hat{f}_p V_p - 0.5 V_p}{\sum_{i=1}^V p_i - 0.5 V_p} \quad (1)$$

1903 To calculate a 95% confidence interval (CI) for  $x_p$ , we first estimated a 95% CI for  $f_p$   
1904 using the Jeffreys interval method<sup>113</sup>, as implemented in the R software package  
1905 (<https://www.r-project.org>), and we then used equation **(1)** to convert its lower  
1906 and upper bounds to lower and upper bounds on the corresponding confidence  
1907 interval for  $x_p$ .

1908

1909 Probability of causal association

1910 The estimated values for  $x_p$  can be interpreted as estimates of the posterior  
1911 probability that a variant with  $p < 0.05$  in our analysis is truly associated with T2D  
1912 rather than due to chance. As our ultimate goal was to quantify the probability of  
1913 *causal* association, rather than just true association, we modeled the probability of  
1914 variant association as a function of (a) the probability of causal association ( $PPA_c$ ),  
1915 influenced in turn by the likelihood that the variant results in gene loss-of-function  
1916 as well as the likelihood that the gene is relevant to T2D; and (b) the prior  
1917 probability of indirect association ( $PPA_i$ ), influenced in turn by the likelihood that  
1918 the variant is in LD with a nearby but different variant that is causally associated  
1919 with T2D. Under the assumption that causal and indirect associations are disjoint  
1920 events, this model expresses PPA as

$$PPA = PPA_c + PPA_i$$

1921  
1922 Precisely determining which coding variant associations are in fact causal requires  
1923 fine mapping of all nearby variants in large sample sizes<sup>6</sup>, which is currently  
1924 infeasible for the mostly rare variants observed in our study. Since we could not  
1925 accurately calculate specific values of  $PPA_c$  and  $PPA_i$  for each variant, we instead  
1926 used estimates of the average the proportion of associations that are causal ( $\alpha$ ),  
1927 where  $\alpha$  is the probability of causal association *conditional* on a true association,  
1928 rather than the absolute probability of causal association. We considered two means  
1929 to estimate  $\alpha$ .  
1930



1931 First, recent analyses have attempted to assess the contribution of nonsynonymous  
1932 variants to T2D or similar traits, either by directly estimating the proportion of  
1933 associations that are due to nonsynonymous variants<sup>79</sup> or by measuring the  
1934 proportion of heritability explained by nonsynonymous variants<sup>78</sup>. These analyses  
1935 suggest that ~10% of T2D associations are likely to be due to nonsynonymous  
1936 variants. As these calculations apply to all associations in the genome, rather than  
1937 those in which at least one nonsynonymous variant achieves significance, they likely  
1938 underestimate the proportion of nonsynonymous associations that are causal.  
1939  
1940 Second, a recent exome array study identified 40 exome-wide significant  
1941 nonsynonymous variant associations and then calculated the probability of causal  
1942 association for each (via credible set analysis)<sup>17</sup>. The reported average probability of  
1943 causal association across these variants of 49.2% provides a direct estimate of  $\alpha$ .  
1944 This estimate is likely less biased than that based on genome-wide analyses of all  
1945 T2D associations, but it is based on a small number of associations and thus has a  
1946 high variance.  
1947  
1948 Based on these considerations, we considered values of 10%, 30%, and 50% for  $\alpha$ .  
1949 and used 30% as our default value for analyses reported in the main manuscript.  
1950 For any value of  $x_p$ , representing the fraction of true associations at a given  $p$ -value  
1951 threshold, we calculated a value for  $x_p^c$ , representing the fraction of causal  
1952 associations at a given  $p$ -value threshold, as  $x_p^c = \alpha x_p$ . Under this model, using a

1953 different value for  $\alpha$  (e.g. 50% or 10%) would scale  $PPA_c$  estimates linearly (e.g. 5/3  
1954 or 1/3 as high).

1955

1956 Incorporation of prior likelihood into posterior probability estimations

1957 Following previous work<sup>81</sup>, the posterior probability of causal association  $x_p^c$  can be  
1958 expressed as a combination of the prior odds of causal association for the variant,  $\pi$   
1959 (i.e. the belief, prior to observing any genetic association data, that the variant is  
1960 causally associated with T2D), and the Bayes factor for causal association of the  
1961 variant calculated from genetic association data,  $BF_c$ :

$$PO_c = BF_c \frac{\pi}{1 - \pi} \quad (2)$$

1962 where  $PO_c$  is the posterior odds of causal association expressed as

$$PO_c = PPA_c / (1 - PPA_c) \quad (3)$$

1963 We use a “c” subscript in  $PO_c$  and  $BF_c$  to emphasize that they are posterior odds (and  
1964 Bayes factors) for causal association, rather than just true association.

1965

1966 Given an estimate  $x_p^c$  of the posterior probability of causal association (i.e.  $PPA_c$ ) for  
1967 a class of variants (e.g. those satisfying  $p < 0.05$ ), as well as a prior probability of  
1968 causal association  $\pi$  for the same class of variants, we can calculate an estimate of  
1969 the average Bayes factor for variants in the class as:

$$BF_p^c = \frac{x_p^c}{1 - x_p^c} \frac{1 - \pi}{\pi} \quad (4)$$

1970 Here,  $BF_p^c$  denotes the average Bayes factor for causal association (i.e. the ratio of  
1971 the likelihood of the observed data under the model of causal association to the

1972 likelihood of the observed data under the model of no association) for variants with  
1973  $p$ -value below a given  $p$ . We note that this equation indirectly infers an average  
1974 Bayes factor from a direct estimate of an average posterior ( $x_p^c$ ) and a specified  
1975 prior  $\pi$ , which is different from how Bayes factors are usually calculated.

1976

1977 Under the assumption that the relationship between a variant's  $\pi$  and  $PO_c$  is, given  
1978 its observed  $p$ -value, conditionally independent of all other variant properties (i.e.  
1979 dependence on properties such as sample size is entirely captured by the observed  
1980  $p$ -value), we calibrated the relationship between  $p$ -value and  $BF_p^c$  using  
1981 nonsynonymous variants within GWAS loci. We modeled  $\pi$  for such variants  
1982 assuming (a) on average 1.1 genes within 250kb of each GWAS signal harbors  
1983 coding variants associated with T2D; (b) missense variants are a mixture of fully  
1984 benign and fully protein-inactivating variants<sup>12</sup>; (c) only inactivating missense  
1985 variants; and (d) one-third of missense variants are inactivating (as estimated by  
1986 the average weight of missense variants in our masks). Based on the 595 genes  
1987 within the 94 T2D GWAS loci in our analysis, this yielded a prior estimate of  
1988  $0.057 = 1.1 \times 94 / 595 \times 0.33$ .

1989

1990 The gene prior was inspired by the often implicit expectation that a GWAS signal  
1991 usually represents a single causal variant<sup>114</sup> affecting a single gene (although  
1992 multiple effector genes may be more common than previously thought<sup>3</sup>). To assess  
1993 the sensitivity of our results to the assumption of 1.1 disease-relevant genes per

1994 T2D GWAS locus, we repeated all calculations with the additional choices of 0.5 and  
1995 2 genes per GWAS locus (**Supplementary Figure 21ab**).

1996

1997 We calculated the variant prior based on the mean weight of variants in our dataset  
1998 as computed for the “weighted” gene-level test, as these weights were designed to  
1999 directly estimate the probability that variants in a mask cause full loss of function.  
2000 This calculation produced a prior estimate of 34.2% for nonsynonymous variants in  
2001 our dataset, not far from a previously reported value of 25%<sup>12</sup>. We thus used a value  
2002 of 33% for the variant prior in our main analysis, with values of 40% and 25% used  
2003 for comparison (**Supplementary Figure 21cd**).

2004

2005 Through the prior probability of causal association for nonsynonymous variants in  
2006 T2D GWAS loci of 0.057, and equations **(1)-(4)** above, we produced a lookup table  
2007 mapping variant  $p$ -values to Bayes factors of causal association ( $BF_c$ ). For any  
2008 subsequent variant  $v$  with observed  $p$ -value  $p(v)$  and a user-specified prior on the  
2009 relevance of its gene to T2D, we then calculated its posterior likelihood of  
2010 association by mapping  $p(v)$  to  $BF_c$  and then employing equations **(2)** and **(3)** to  
2011 calculate an estimated posterior probability of causal association ( $PPA_c$ ). Although  
2012 not presented here, lower and upper confidence intervals on  $PPA_c$  can also be  
2013 estimated by repeating this procedure using the lower and upper confidence  
2014 intervals for  $x_{p^c}$  in equation **(4)**.

2015

2016 Sensitivity of  $PPA_c$  to modeling parameters

2017 The above calculations rely on two parameters, the specific values of which will  
2018 affect final  $PPA_c$  estimates. First, they require a parameter for the proportion of true  
2019 nonsynonymous associations that are causal. As described above and in the text, we  
2020 used a value – of 30% – in between a published estimate of the proportion of  
2021 nonsynonymous associations within GWAS loci that are causal (49.2%) and a  
2022 published estimate of the proportion of causal associations that are nonsynonymous  
2023 (~10%). Using a different value (e.g. 50% or 10%) would scale the  $PPA_c$  estimates  
2024 linearly (e.g. 5/3 or 1/3 as high).

2025

2026 In addition, calculations involving a user-specified prior require a parameter for the  
2027 proportion of nonsynonymous variants in GWAS loci that causally influence T2D  
2028 risk (prior to any observed associations). This parameter does not affect  $PPA_c$   
2029 estimates genome-wide or within GWAS loci, as we directly estimate  $PPA_c$  estimates  
2030 for these genes from our data and therefore do not require a user-specified prior.

2031 Although we decompose this parameter into two – a parameter for the proportion of  
2032 genes within T2D GWAS loci that are relevant to disease and a parameter for the  
2033 proportion of missense variants within a gene that result in loss of function – only  
2034 the product of the two parameters is used in the model. **Supplementary Figure 21**  
2035 shows the impact of different values for these two parameters.

## 2036 References

- 2037 1. Altshuler, D., Daly, M.J. & Lander, E.S. Genetic mapping in human disease.  
2038 *Science* 322, 881-8 (2008).
- 2039 2. Welter, D. *et al.* The NHGRI GWAS Catalog, a curated resource of SNP-trait  
2040 associations. *Nucleic Acids Res* 42, D1001-6 (2014).
- 2041 3. Boyle, E.A., Li, Y.I. & Pritchard, J.K. An expanded view of complex traits: from  
2042 polygenic to omnigenic. *Cell* 169, 1177-86 (2017).
- 2043 4. Gusev, A. *et al.* Partitioning heritability of regulatory and cell-type-specific  
2044 variants across 11 common diseases. *Am J Hum Genet* 95, 535-52 (2014).
- 2045 5. Maurano, M.T. *et al.* Systematic localization of common disease-associated  
2046 variation in regulatory DNA. *Science* 337, 1190-5 (2012).
- 2047 6. Gaulton, K.J. *et al.* Genetic fine mapping and genomic annotation defines  
2048 causal mechanisms at type 2 diabetes susceptibility loci. *Nat Genet* 47, 1415-  
2049 25 (2015).
- 2050 7. Grotz, A.K., Gloyn, A.L. & Thomsen, S.K. Prioritising causal genes at type 2  
2051 diabetes risk loci. *Curr Diab Rep* 17, 76 (2017).
- 2052 8. Claussnitzer, M. *et al.* FTO obesity variant circuitry and adipocyte browning  
2053 in humans. *N Engl J Med* 373, 895-907 (2015).
- 2054 9. Musunuru, K. *et al.* From noncoding variant to phenotype via SORT1 at the  
2055 1p13 cholesterol locus. *Nature* 466, 714-9 (2010).
- 2056 10. Rusu, V. *et al.* Type 2 diabetes variants disrupt function of SLC16A11 through  
2057 two distinct mechanisms. *Cell* 170, 199-212 e20 (2017).
- 2058 11. Eyre-Walker, A. Evolution in health and medicine Sackler colloquium: genetic  
2059 architecture of a complex trait and its implications for fitness and genome-  
2060 wide association studies. *Proc Natl Acad Sci U S A* 107 Suppl 1, 1752-6  
2061 (2010).
- 2062 12. Zuk, O. *et al.* Searching for missing heritability: designing rare variant  
2063 association studies. *Proc Natl Acad Sci U S A* 111, E455-64 (2014).
- 2064 13. Cirulli, E.T. & Goldstein, D.B. Uncovering the roles of rare variants in common  
2065 disease through whole-genome sequencing. *Nat Rev Genet* 11, 415-25 (2010).
- 2066 14. McClellan, J. & King, M.C. Genetic heterogeneity in human disease. *Cell* 141,  
2067 210-7 (2010).
- 2068 15. Plenge, R.M., Scolnick, E.M. & Altshuler, D. Validating therapeutic targets  
2069 through human genetics. *Nat Rev Drug Discov* 12, 581-94 (2013).
- 2070 16. Dickson, S.P., Wang, K., Krantz, I., Hakonarson, H. & Goldstein, D.B. Rare  
2071 variants create synthetic genome-wide associations. *PLoS Biol* 8, e1000294  
2072 (2010).
- 2073 17. Mahajan, A. *et al.* Refining the accuracy of validated target identification  
2074 through coding variant fine-mapping in type 2 diabetes. *Nat Genet* 50, 559-  
2075 571 (2018).
- 2076 18. Cohen, J. *et al.* Low LDL cholesterol in individuals of African descent resulting  
2077 from frequent nonsense mutations in PCSK9. *Nat Genet* 37, 161-5 (2005).
- 2078 19. Flannick, J. *et al.* Loss-of-function mutations in SLC30A8 protect against type  
2079 2 diabetes. *Nat Genet* 46, 357-63 (2014).

- 2080 20. Rivas, M.A. *et al.* Human genomics. Effect of predicted protein-truncating  
2081 genetic variants on the human transcriptome. *Science* 348, 666-9 (2015).
- 2082 21. Lohmueller, K.E. *et al.* Whole-exome sequencing of 2,000 Danish individuals  
2083 and the role of rare coding variants in type 2 diabetes. *Am J Hum Genet* 93,  
2084 1072-86 (2013).
- 2085 22. Purcell, S.M. *et al.* A polygenic burden of rare disruptive mutations in  
2086 schizophrenia. *Nature* 506, 185-90 (2014).
- 2087 23. Do, R. *et al.* Exome sequencing identifies rare LDLR and APOA5 alleles  
2088 conferring risk for myocardial infarction. *Nature* 518, 102-6 (2015).
- 2089 24. Fuchsberger, C. *et al.* The genetic architecture of type 2 diabetes. *Nature* 536,  
2090 41-7 (2016).
- 2091 25. Luo, Y. *et al.* Exploring the genetic architecture of inflammatory bowel  
2092 disease by whole-genome sequencing identifies association at ADCY7. *Nat*  
2093 *Genet* 49, 186-192 (2017).
- 2094 26. Jun, G. *et al.* Evaluating the contribution of rare variants to type 2 diabetes  
2095 and related traits using pedigrees. *Proc Natl Acad Sci U S A* (2017).
- 2096 27. Dewey, F.E. *et al.* Distribution and clinical impact of functional variants in  
2097 50,726 whole-exome sequences from the DiscovEHR study. *Science*  
2098 354(2016).
- 2099 28. Agarwala, V., Flannick, J., Sunyaev, S., Go, T.D.C. & Altshuler, D. Evaluating  
2100 empirical bounds on complex disease genetic architecture. *Nat Genet* 45,  
2101 1418-27 (2013).
- 2102 29. Kryukov, G.V., Shpunt, A., Stamatoyannopoulos, J.A. & Sunyaev, S.R. Power of  
2103 deep, all-exon resequencing for discovery of human trait genes. *Proc Natl*  
2104 *Acad Sci U S A* 106, 3871-6 (2009).
- 2105 30. Moutsianas, L. *et al.* The power of gene-based rare variant methods to detect  
2106 disease-associated variation and test hypotheses about complex disease.  
2107 *PLoS Genet* 11, e1005165 (2015).
- 2108 31. Sveinbjornsson, G. *et al.* Weighting sequence variants based on their  
2109 annotation increases power of whole-genome association studies. *Nat Genet*  
2110 48, 314-7 (2016).
- 2111 32. Govaerts, C. *et al.* Obesity-associated mutations in the melanocortin 4  
2112 receptor provide novel insights into its function. *Peptides* 26, 1909-19  
2113 (2005).
- 2114 33. Larsen, L.H. *et al.* Prevalence of mutations and functional analyses of  
2115 melanocortin 4 receptor variants identified among 750 men with juvenile-  
2116 onset obesity. *J Clin Endocrinol Metab* 90, 219-24 (2005).
- 2117 34. Morris, A.P. *et al.* Large-scale association analysis provides insights into the  
2118 genetic architecture and pathophysiology of type 2 diabetes. *Nat Genet* 44,  
2119 981-90 (2012).
- 2120 35. Tan, K. *et al.* Functional characterization and structural modeling of obesity  
2121 associated mutations in the melanocortin 4 receptor. *Endocrinology* 150,  
2122 114-25 (2009).
- 2123 36. Thearle, M.S. *et al.* Greater impact of melanocortin-4 receptor deficiency on  
2124 rates of growth and risk of type 2 diabetes during childhood compared with  
2125 adulthood in Pima Indians. *Diabetes* 61, 250-7 (2012).

- 2126 37. Farooqi, I.S. *et al.* Clinical spectrum of obesity and mutations in the  
2127 melanocortin 4 receptor gene. *N Engl J Med* 348, 1085-95 (2003).
- 2128 38. Wu, M.C. *et al.* Rare-variant association testing for sequencing data with the  
2129 sequence kernel association test. *Am J Hum Genet* 89, 82-93 (2011).
- 2130 39. Li, M.X., Gui, H.S., Kwan, J.S. & Sham, P.C. GATES: a rapid and powerful gene-  
2131 based association test using extended Simes procedure. *Am J Hum Genet* 88,  
2132 283-93 (2011).
- 2133 40. Sladek, R. *et al.* A genome-wide association study identifies novel risk loci for  
2134 type 2 diabetes. *Nature* 445, 881-5 (2007).
- 2135 41. Steinthorsdottir, V. *et al.* Identification of low-frequency and rare sequence  
2136 variants associated with elevated or reduced risk of type 2 diabetes. *Nat*  
2137 *Genet* 46, 294-8 (2014).
- 2138 42. Davidson, H.W., Wenzlau, J.M. & O'Brien, R.M. Zinc transporter 8 (ZnT8) and  
2139 beta cell function. *Trends Endocrinol Metab* 25, 415-24 (2014).
- 2140 43. Rutter, G.A. & Chimienti, F. SLC30A8 mutations in type 2 diabetes.  
2141 *Diabetologia* 58, 31-6 (2015).
- 2142 44. Nicolson, T.J. *et al.* Insulin storage and glucose homeostasis in mice null for  
2143 the granule zinc transporter ZnT8 and studies of the type 2 diabetes-  
2144 associated variants. *Diabetes* 58, 2070-83 (2009).
- 2145 45. Chambers, J.C. *et al.* Common genetic variation near MC4R is associated with  
2146 waist circumference and insulin resistance. *Nat Genet* 40, 716-8 (2008).
- 2147 46. Raimondo, A. *et al.* Type 2 Diabetes Risk Alleles Reveal a Role for  
2148 Peptidylglycine Alpha-amidating Monooxygenase in Beta Cell Function.  
2149 *bioRxiv* (2017).
- 2150 47. Wessel, J. *et al.* Low-frequency and rare exome chip variants associate with  
2151 fasting glucose and type 2 diabetes susceptibility. *Nat Commun* 6, 5897  
2152 (2015).
- 2153 48. Wishart, D.S. *et al.* DrugBank 5.0: a major update to the DrugBank database  
2154 for 2018. *Nucleic Acids Res* (2017).
- 2155 49. Blake, J.A. *et al.* Mouse Genome Database (MGD)-2017: community  
2156 knowledge resource for the laboratory mouse. *Nucleic Acids Res* 45, D723-  
2157 D729 (2017).
- 2158 50. Wang, M.C., Min, W., Freudiger, C.W., Ruvkun, G. & Xie, X.S. RNAi screening for  
2159 fat regulatory genes with SRS microscopy. *Nat Methods* 8, 135-8 (2011).
- 2160 51. Xin, Y. *et al.* RNA Sequencing of Single Human Islet Cells Reveals Type 2  
2161 Diabetes Genes. *Cell Metab* 24, 608-615 (2016).
- 2162 52. Torres, J.M. *et al.* Integrative cross tissue analysis of gene expression  
2163 identifies novel type 2 diabetes genes. *bioRxiv* (2017).
- 2164 53. Flannick, J. & Florez, J.C. Type 2 diabetes: genetic data sharing to advance  
2165 complex disease research. *Nat Rev Genet* 17, 535-49 (2016).
- 2166 54. Rossin, E.J. *et al.* Proteins encoded in genomic regions associated with  
2167 immune-mediated disease physically interact and suggest underlying  
2168 biology. *PLoS Genet* 7, e1001273 (2011).
- 2169 55. Mahajan, A. *et al.* Fine-mapping of an expanded set of type 2 diabetes loci to  
2170 single-variant resolution using high-density imputation and islet-specific  
2171 epigenome maps. *bioRxiv* (2018).



- 2172 56. Thomsen, S.K. *et al.* Systematic functional characterization of candidate  
2173 causal genes for type 2 diabetes risk variants. *Diabetes* 65, 3805-11 (2016).
- 2174 57. Jucker, M. The benefits and limitations of animal models for translational  
2175 research in neurodegenerative diseases. *Nat Med* 16, 1210-4 (2010).
- 2176 58. Seok, J. *et al.* Genomic responses in mouse models poorly mimic human  
2177 inflammatory diseases. *Proc Natl Acad Sci U S A* 110, 3507-12 (2013).
- 2178 59. Takagi, M. *et al.* ATM Regulates Adipocyte Differentiation and Contributes to  
2179 Glucose Homeostasis. *Cell Rep* (2015).
- 2180 60. Woods, A., Leiper, J.M. & Carling, D. The role of ATM in response to metformin  
2181 treatment and activation of AMPK. *Nat Genet* 44, 360-1 (2012).
- 2182 61. Yee, S.W., Chen, L. & Giacomini, K.M. The role of ATM in response to  
2183 metformin treatment and activation of AMPK. *Nat Genet* 44, 359-60 (2012).
- 2184 62. Zhou, K. *et al.* Common variants near ATM are associated with glycemic  
2185 response to metformin in type 2 diabetes. *Nat Genet* 43, 117-20 (2011).
- 2186 63. Espach, Y., Lochner, A., Strijdom, H. & Huisamen, B. ATM protein kinase  
2187 signaling, type 2 diabetes and cardiovascular disease. *Cardiovasc Drugs Ther*  
2188 29, 51-8 (2015).
- 2189 64. Bodmer, W. & Bonilla, C. Common and rare variants in multifactorial  
2190 susceptibility to common diseases. *Nat Genet* 40, 695-701 (2008).
- 2191 65. Visscher, P.M. *et al.* 10 years of GWAS discovery: biology, function, and  
2192 translation. *Am J Hum Genet* 101, 5-22 (2017).
- 2193 66. Scott, R.A. *et al.* An expanded genome-wide association study of type 2  
2194 diabetes in Europeans. *Diabetes* (2017).
- 2195 67. 1000 Genomes Project Consortium *et al.* A global reference for human  
2196 genetic variation. *Nature* 526, 68-74 (2015).
- 2197 68. McCarthy, S. *et al.* A reference panel of 64,976 haplotypes for genotype  
2198 imputation. *Nat Genet* 48, 1279-83 (2016).
- 2199 69. So, H.C., Gui, A.H., Cherny, S.S. & Sham, P.C. Evaluating the heritability  
2200 explained by known susceptibility variants: a survey of ten complex diseases.  
2201 *Genet Epidemiol* 35, 310-7 (2011).
- 2202 70. Segre, A.V. *et al.* Common inherited variation in mitochondrial genes is not  
2203 enriched for associations with type 2 diabetes or related glycemic traits. *PLoS*  
2204 *Genet* 6(2010).
- 2205 71. Altshuler, D. *et al.* The common PPARgamma Pro12Ala polymorphism is  
2206 associated with decreased risk of type 2 diabetes. *Nat Genet* 26, 76-80  
2207 (2000).
- 2208 72. Sinner, M.F. *et al.* Lack of replication in polymorphisms reported to be  
2209 associated with atrial fibrillation. *Heart Rhythm* 8, 403-9 (2011).
- 2210 73. Hirschhorn, J.N., Lohmueller, K., Byrne, E. & Hirschhorn, K. A comprehensive  
2211 review of genetic association studies. *Genet Med* 4, 45-61 (2002).
- 2212 74. Wacholder, S., Chanock, S., Garcia-Closas, M., El Ghormli, L. & Rothman, N.  
2213 Assessing the probability that a positive report is false: an approach for  
2214 molecular epidemiology studies. *J Natl Cancer Inst* 96, 434-42 (2004).
- 2215 75. Wakefield, J. A Bayesian measure of the probability of false discovery in  
2216 genetic epidemiology studies. *Am J Hum Genet* 81, 208-27 (2007).

- 2217 76. Lehmann, E.L. Some principles of the theory of testing hypotheses. *Annals of*  
2218 *Mathematical Statistics* 21, 1-26 (1950).
- 2219 77. Peterson, M. *An introduction to decision theory*, x, 317 p. (Cambridge  
2220 University Press, New York, 2009).
- 2221 78. Finucane, H.K. *et al.* Partitioning heritability by functional annotation using  
2222 genome-wide association summary statistics. *Nat Genet* 47, 1228-35 (2015).
- 2223 79. Pickrell, J.K. Joint analysis of functional genomic data and genome-wide  
2224 association studies of 18 human traits. *Am J Hum Genet* 94, 559-73 (2014).
- 2225 80. Smith, S.B. *et al.* Rfx6 directs islet formation and insulin production in mice  
2226 and humans. *Nature* 463, 775-80 (2010).
- 2227 81. Stephens, M. & Balding, D.J. Bayesian statistical methods for genetic  
2228 association studies. *Nat Rev Genet* 10, 681-90 (2009).
- 2229 82. Wagner, J. *et al.* A dynamic map for learning, communicating, navigating and  
2230 improving therapeutic development. *Nat Rev Drug Discov* 17, 150 (2018).
- 2231 83. Timpson, N.J., Greenwood, C.M.T., Soranzo, N., Lawson, D.J. & Richards, J.B.  
2232 Genetic architecture: the shape of the genetic contribution to human traits  
2233 and disease. *Nat Rev Genet* (2017).
- 2234 84. Starita, L.M. *et al.* Variant interpretation: functional assays to the rescue. *Am J*  
2235 *Hum Genet* 101, 315-325 (2017).
- 2236 85. SIGMA Type 2 Diabetes Consortium *et al.* Association of a low-frequency  
2237 variant in HNF1A with type 2 diabetes in a Latino population. *JAMA* 311,  
2238 2305-14 (2014).
- 2239 86. Fu, W. *et al.* Analysis of 6,515 exomes reveals the recent origin of most  
2240 human protein-coding variants. *Nature* 493, 216-20 (2013).
- 2241 87. Fisher, S. *et al.* A scalable, fully automated process for construction of  
2242 sequence-ready human exome targeted capture libraries. *Genome Biol* 12, R1  
2243 (2011).
- 2244 88. Li, H. & Durbin, R. Fast and accurate short read alignment with Burrows-  
2245 Wheeler transform. *Bioinformatics* 25, 1754-60 (2009).
- 2246 89. DePristo, M.A. *et al.* A framework for variation discovery and genotyping  
2247 using next-generation DNA sequencing data. *Nat Genet* 43, 491-8 (2011).
- 2248 90. Purcell, S. *et al.* PLINK: a tool set for whole-genome association and  
2249 population-based linkage analyses. *Am J Hum Genet* 81, 559-75 (2007).
- 2250 91. Price, A.L. *et al.* Principal components analysis corrects for stratification in  
2251 genome-wide association studies. *Nat Genet* 38, 904-9 (2006).
- 2252 92. Skol, A.D., Scott, L.J., Abecasis, G.R. & Boehnke, M. Optimal designs for two-  
2253 stage genome-wide association studies. *Genet Epidemiol* 31, 776-88 (2007).
- 2254 93. McLaren, W. *et al.* The Ensembl Variant Effect Predictor. *Genome Biol* 17, 122  
2255 (2016).
- 2256 94. Aken, B.L. *et al.* Ensembl 2017. *Nucleic Acids Res* 45, D635-D642 (2017).
- 2257 95. Pujar, S. *et al.* Consensus coding sequence (CCDS) database: a standardized  
2258 set of human and mouse protein-coding regions supported by expert  
2259 curation. *Nucleic Acids Res* (2017).
- 2260 96. Liu, X., Wu, C., Li, C. & Boerwinkle, E. dbNSFP v3.0: a one-stop database of  
2261 functional predictions and annotations for human nonsynonymous and  
2262 splice-site SNVs. *Hum Mutat* 37, 235-41 (2016).

- 2263 97. Jagadeesh, K.A. *et al.* M-CAP eliminates a majority of variants of uncertain  
2264 significance in clinical exomes at high sensitivity. *Nat Genet* 48, 1581-6  
2265 (2016).
- 2266 98. Kang, H.M. *et al.* Variance component model to account for sample structure  
2267 in genome-wide association studies. *Nat Genet* 42, 348-54 (2010).
- 2268 99. Ma, C., Blackwell, T., Boehnke, M., Scott, L.J. & Go, T.D.i. Recommended joint  
2269 and meta-analysis strategies for case-control association testing of single  
2270 low-count variants. *Genet Epidemiol* 37, 539-50 (2013).
- 2271 100. Willer, C.J., Li, Y. & Abecasis, G.R. METAL: fast and efficient meta-analysis of  
2272 genomewide association scans. *Bioinformatics* 26, 2190-1 (2010).
- 2273 101. SIGMA Type 2 Diabetes Consortium *et al.* Sequence variants in SLC16A11 are  
2274 a common risk factor for type 2 diabetes in Mexico. *Nature* 506, 97-101  
2275 (2014).
- 2276 102. Lee, S. *et al.* Optimal unified approach for rare-variant association testing  
2277 with application to small-sample case-control whole-exome sequencing  
2278 studies. *Am J Hum Genet* 91, 224-37 (2012).
- 2279 103. Han, B., Kang, H.M. & Eskin, E. Rapid and accurate multiple testing correction  
2280 and power estimation for millions of correlated markers. *PLoS Genet* 5,  
2281 e1000456 (2009).
- 2282 104. Conneely, K.N. & Boehnke, M. So many correlated tests, so little time! Rapid  
2283 adjustment of P values for multiple correlated tests. *Am J Hum Genet* 81,  
2284 1158-68 (2007).
- 2285 105. Psaty, B.M. *et al.* Cohorts for Heart and Aging Research in Genomic  
2286 Epidemiology (CHARGE) Consortium: Design of prospective meta-analyses of  
2287 genome-wide association studies from 5 cohorts. *Circ Cardiovasc Genet* 2, 73-  
2288 80 (2009).
- 2289 106. Yu, B. *et al.* Rare exome sequence variants in *CLCN6* reduce blood pressure  
2290 levels and hypertension risk. *Circ Cardiovasc Genet* 9, 64-70 (2016).
- 2291 107. Brody, J.A. *et al.* Analysis commons, a team approach to discovery in a big-  
2292 data environment for genetic epidemiology. *Nat Genet* 49, 1560-3 (2017).
- 2293 108. Chen, H. *et al.* Control for population structure and relatedness for binary  
2294 traits in genetic association studies via logistic mixed models. *Am J Hum*  
2295 *Genet* 98, 653-66 (2016).
- 2296 109. Haghverdizadeh, P., Sadat Haerian, M., Haghverdizadeh, P. & Sadat Haerian,  
2297 B. ABCC8 genetic variants and risk of diabetes mellitus. *Gene* 545, 198-204  
2298 (2014).
- 2299 110. Barbeira, A.N. *et al.* Exploring the phenotypic consequences of tissue specific  
2300 gene expression variation inferred from GWAS summary statistics. *bioRxiv*  
2301 (2017).
- 2302 111. Mahajan, A. *et al.* Genome-wide trans-ancestry meta-analysis provides  
2303 insight into the genetic architecture of type 2 diabetes susceptibility. *Nat*  
2304 *Genet* 46, 234-44 (2014).
- 2305 112. Das, S. *et al.* Next-generation genotype imputation service and methods. *Nat*  
2306 *Genet* 48, 1284-7 (2016).
- 2307 113. Brown, L.D., Cai, T.T. & Dasgupta, A. Interval estimation for a binomial  
2308 proportion. *Statistical Science* 16, 101-133 (2001).

- 2309 114. Wellcome Trust Case Control Consortium *et al.* Bayesian refinement of  
2310 association signals for 14 loci in 3 common diseases. *Nat Genet* 44, 1294-301  
2311 (2012).  
2312  
2313

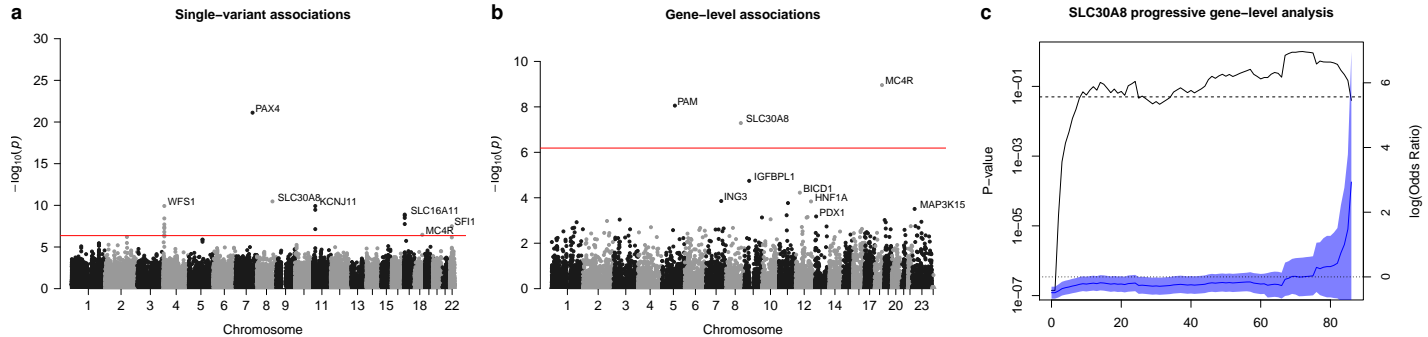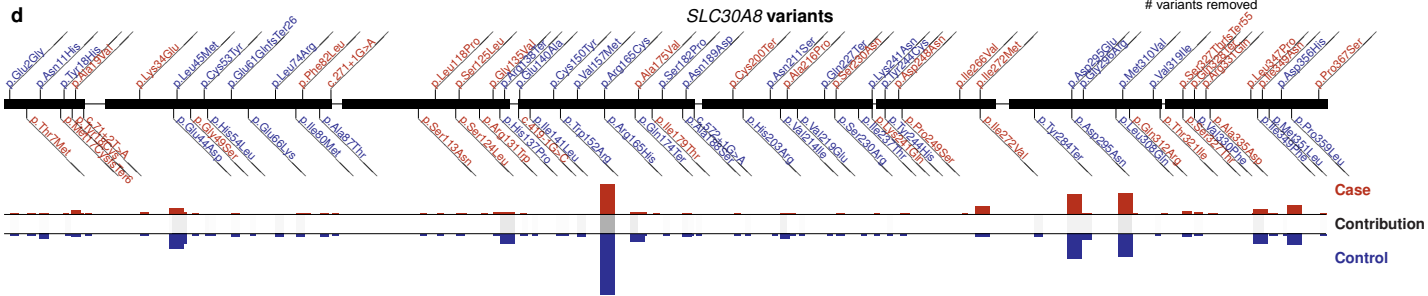

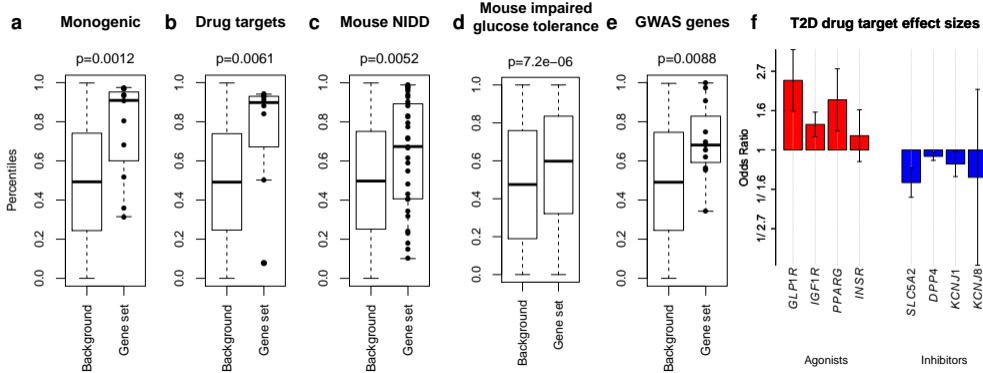



**a** Predicted power to detect known T2D drug targets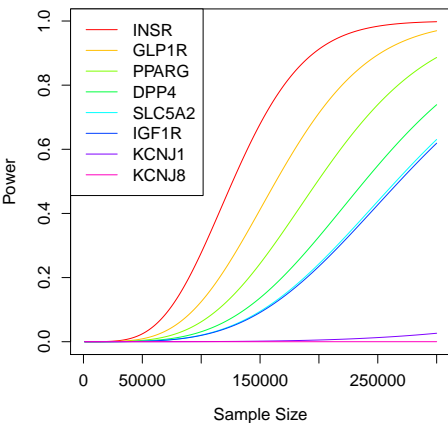**b** Decision support from exome sequence data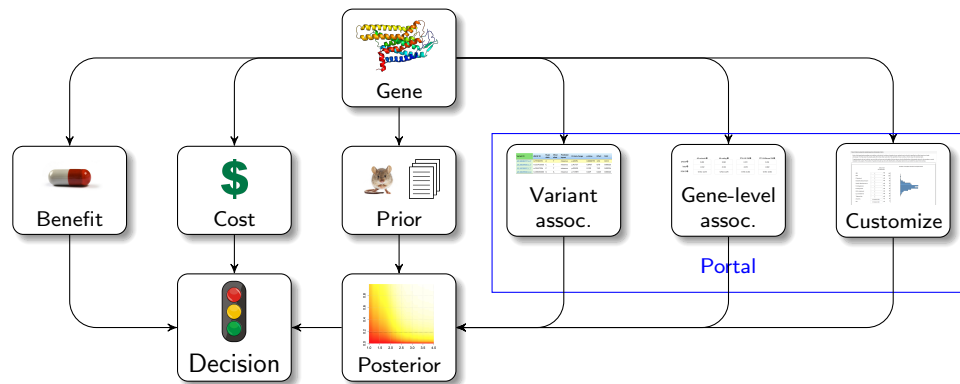**c** Fraction of causal coding associations

Mahajan *et al*, 2018 (0.49)  
 Finucane *et al*, 2015 (~0.10)  
 Pickrell, 2014 (~0.10)

**d** Causal associations at T2D GWAS loci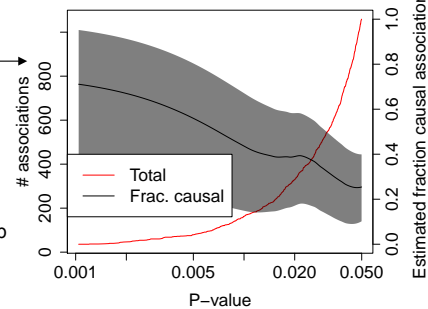

Compare direction of effect

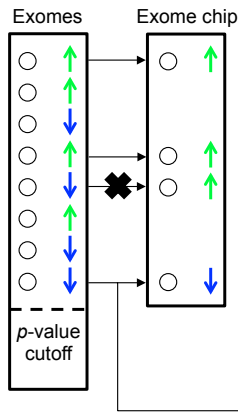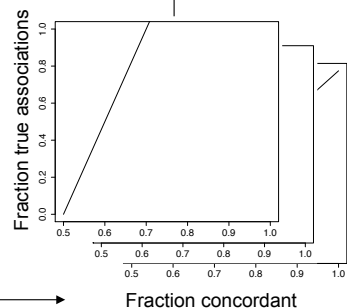**e** Map to Bayes Factor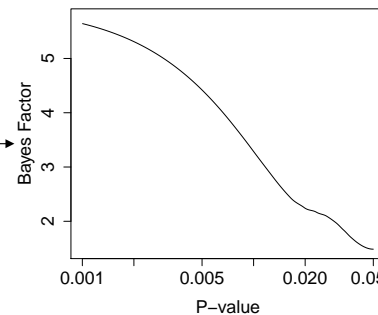

Calibrate from prior model at GWAS loci

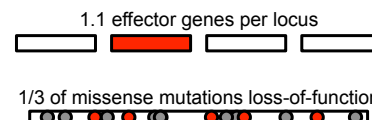**f** Probability of nonsynonymous variant association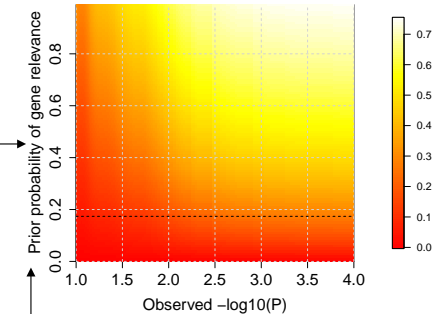

Researcher gene or variant prior

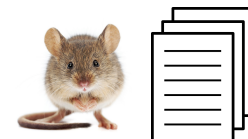

Source: https://www.biorxiv.org/content/10.1101/371450.full.pdf
